*Pyricularia graminis-tritici* sp. nov. on wheat

**Wheat blast disease caused by *Pyricularia graminis-tritici* sp. nov.**

V.L. Castroagudín<sup>1</sup>, S.I. Moreira<sup>2</sup>, D.A.S. Pereira<sup>1,3</sup>, S.S. Moreira<sup>1</sup>, P.C. Brunner<sup>3</sup>,  
J.L.N. Maciel<sup>4</sup>, P.W. Crous<sup>5,6,7</sup>, B.A. McDonald<sup>3</sup>, E. Alves<sup>2</sup>, P.C. Ceresini<sup>1</sup>

<sup>1</sup> Department of Phytopathology, Rural Engineering, and Soil Science (DEFERS),  
University of São Paulo State, Ilha Solteira, São Paulo, Brazil. Corresponding author  
e-mail: paulo.ceresini@bio.feis.unesp.br.

<sup>2</sup> Department of Phytopathology, Federal University of Lavras, Lavras, Minas Gerais,  
Brazil.

<sup>3</sup> Plant Pathology Group, Institute of Integrative Biology, ETH Zürich, Zürich,  
Switzerland.

<sup>4</sup> Brazilian Agriculture Research Corporation-Wheat (EMBRAPA-Trigo), Passo  
Fundo, Rio Grande do Sul, Brazil.

<sup>5</sup> CBS-KNAW Fungal Biodiversity Centre, Uppsalalaan 8, 3584 CT Utrecht, The  
Netherlands.

<sup>6</sup> Department of Microbiology and Plant Pathology, Forestry and Agricultural  
Biotechnology Institute (FABI), University of Pretoria, Pretoria 0002, South Africa.

<sup>7</sup> Microbiology, Department of Biology, Utrecht University, Padualaan 8, 3584 CH  
Utrecht, The Netherlands.

**Abstract** *Pyricularia oryzae* is a species complex that causes blast disease on more  
than 50 species of poaceous plants. *Pyricularia oryzae* has a worldwide distribution  
as a rice (*Oryza*) pathogen and in the last century emerged as an important wheat

(*Triticum*) pathogen in southern Brazil. Presently, *P. oryzae* pathotype *Oryza* is considered the rice blast pathogen, whereas *P. oryzae* pathotype *Triticum* is the wheat blast pathogen. In this study we investigated whether the *Oryza* and *Triticum* pathotypes of *P. oryzae* were distinct at the species level. We also describe a new *Pyricularia* species causing blast on several other poaceous hosts in Brazil, including wheat. We conducted phylogenetic analyses using 10 housekeeping loci from an extensive sample ( $N = 128$ ) of sympatric populations of *P. oryzae* adapted to rice, wheat and other poaceous hosts found in or near wheat fields. The Bayesian phylogenetic analysis grouped the isolates into two major monophyletic clusters (I and II) with high Bayesian probabilities ( $P = 0.99$ ). Cluster I contained isolates obtained from wheat as well as other *Poaceae* hosts ( $P = 0.98$ ). Cluster II was divided into three host-associated clades (Clades 1, 2 and 3;  $P > 0.75$ ). Clade 1 contained isolates obtained from wheat and other poaceous hosts, Clade 2 contained exclusively wheat-derived isolates, and Clade 3 comprised isolates associated only with rice. Our interpretation was that cluster I and cluster II correspond to two distinct species: *Pyricularia graminis-tritici* sp. nov. (Pgt), newly described in this study, and *Pyricularia oryzae* (Po). The host-associated clades found in *P. oryzae* Cluster II correspond to *P. oryzae* pathotype *Triticum* (PoT; Clades 1 and 2), and *P. oryzae* pathotype *Oryza* (PoO; Clade 3). No morphological or cultural differences were observed among these species, but a distinctive pathogenicity spectrum was observed. Pgt and PoT were pathogenic and highly aggressive on *Triticum aestivum* (wheat), *Hordeum vulgare* (barley), *Urochloa brizantha* (signal grass) and *Avena sativa* (oats). PoO was highly virulent on the original rice host (*Oryza sativa*), and also on wheat, barley, and oats, but not on signal grass. We concluded that blast disease on wheat and its associated *Poaceae*



hosts in Brazil is caused by multiple *Pyricularia* species: the newly described *Pyricularia graminis-tritici* sp. nov., and the known *P. oryzae* pathotypes *Triticum* and *Oryza*. To our knowledge, *P. graminis-tritici* sp. nov. is already widely distributed in Brazil and To our knowledge, *P. graminis-tritici* sp. nov. is already widely distributed in Brazil and encompasses the clade containing the strains characterized in the wheat blast outbreak recently reported in Bangladesh. This indicates that *P. graminis-tritici* sp. nov. represents a serious threat to wheat cultivation globally.

**Key words** cryptic species, host adaptation, phylogenetics, systematics, *Triticum aestivum*.

**Article info** Received: xxxxx 2016; Accepted: xxxXXX 2016; Published: xxx December 2016.

## INTRODUCTION

*Pyricularia oryzae* is a species complex (Couch & Kohn 2002) that causes blast disease on more than 50 species of poaceous plants, including important crops such as rice, wheat, barley, millet and oats (Urashima & Kato 1998, Couch & Kohn 2002, Takabayashi et al. 2002, Murakami et al. 2003, Couch et al. 2005). On the basis of host specificity, mating ability, and genetic relatedness, *P. oryzae* isolates were classified into several subgroups with restricted host range, including: *Oryza* pathotype, pathogenic on rice (*Oryza sativa*); *Setaria* pathotype, pathogenic on foxtail millet (*Setaria italica*); *Panicum* pathotype, pathogenic on common millet (*Panicum miliaceum*); *Eleusine* pathotype, pathogenic on finger millet (*Eleusine coracana*); *Triticum* pathotype, pathogenic on wheat (*Triticum aestivum*); *Avena* pathotype, pathogenic on oats (*Avena sativa*); and the *Lolium* pathotype, pathogenic on perennial ryegrass (*Lolium perenne*) (Urashima et al. 1993, Kato et al. 2000,

Tosa et al. 2004, Tosa & Chuma 2014). Kato and collaborators (Kato et al. 2000) reported that isolates of *P. oryzae* recovered from *Eleusine*, *Panicum*, *Oryza*, *Setaria*, and *Triticum* spp. form a highly related group that is partially inter-fertile with the *Oryza* subgroup (i.e. the rice blast pathogen). In addition, the *Oryza* and *Setaria* pathotypes contain physiological races that show distinct patterns of virulence on cultivars within their host species (Tosa & Chuma 2014). Both host species-specificity and cultivar-specificity are governed by gene-for-gene interactions (Silue et al. 1992, Takabayashi et al. 2002, Tosa et al. 2006, Valent & Khang 2010).

The *P. oryzae* pathotype *Triticum* is considered the causal agent of wheat blast in South America and has also been associated with blast disease on barley, rye, triticale, and signal grass (*Urochloa* spp.) in central-western and southern Brazil (Lima & Minella 2003, Verzignassi et al. 2012). Wheat blast was first reported in Paraná State, Brazil in 1985 (Igarashi et al. 1986, Anjos et al. 1996). Due to the lack of resistant cultivars and effective fungicides for disease management, wheat blast has become widely distributed across all the wheat-cropping areas in Brazil, causing crop losses from 40–100 % (Silva et al. 2009, Maciel 2011, Castroagudín et al. 2015). Wheat blast also occurs in Bolivia, Argentina and Paraguay (Duveiller et al. 2010) but the disease has never been reported outside South America (Maciel 2011), though a recent outbreak was very recently reported in Bangladesh (The Daily Star, March 01, 2016, accessed at <http://www.thedailystar.net/backpage/wheat-blast-threatens-yield-784372>). Wheat blast is considered a major quarantine disease and a threat to wheat crops in the United States (Duveiller et al. 2007, Kohli et al. 2011).

As wheat blast emerged in an area of southern Brazil where rice blast has been prevalent, it was proposed that the rice pathogen had evolved to parasitize wheat (Igarashi et al. 1986). Urashima et al. (1993) provided evidence based on pathogenicity, reproductive isolation and genetic data that indicated the existence of two distinct groups of *P. oryzae* causing wheat blast in Brazil, one that infects rice and wheat and one that infects only wheat. In that study, wheat-derived isolates were reported to infect grass plants from six different *Poaceae* tribes. In addition, crosses of wheat-derived isolates with strains from *Eleusine coracana*, *Urochloa plantaginea*, and *Setaria indica* (*Paniceae*) produced mature perithecia with viable ascospores (evidence of fertile crosses) (Urashima et al. 1993). On the contrary, progeny from the crosses between wheat- and rice-derived isolates were infertile (Urashima et al. 1993). The expectation from the work of Urashima and his collaborators was that two distinct pyricularia-like pathogens cause wheat blast disease in Brazil. However, it is not clear whether a population of *P. oryzae* able to infect both rice and wheat still coexists with a population that infects only wheat.

Several studies suggested that the wheat-adapted *P. oryzae* population was derived *de novo* from a non-rice host. Fingerprinting with the repetitive DNA probes MGR563 and MGR586 found a high level of differentiation between *P. oryzae* pathotype *Oryza* (PoO) and *P. oryzae* pathotype *Triticum* (PoT) from Brazil (Farman 2002). In fact, the fingerprints from wheat-derived isolates resembled those from typical isolates non-pathogenic to rice (Hamer 1991, Valent & Chumley 1991, Urashima et al. 1999, Farman 2002). Maciel et al. (2014) showed that the Brazilian wheat-adapted population of *P. oryzae* was highly differentiated ( $F_{CT} = 0.896$ ,  $P \leq 0.001$ ) from the local rice-adapted populations (Maciel et al. 2014). Analyses of the current

pathotype diversity of *P. oryzae* showed that none of the 69 wheat-derived isolates were able to infect rice (Maciel et al. 2014).

Phylogenetic analyses demonstrated that *Pyricularia* is a species-rich genus in which different species evolved through repeated radiation events from a common ancestor (Hirata et al. 2007, Choi et al. 2013, Klaubauf et al. 2014). Multi-locus phylogenetic analyses established that *P. oryzae* and *P. grisea* were independent phylogenetic species (Taylor et al. 2000, Couch & Kohn 2002) and showed that the contemporary rice-infecting pathogen (*P. oryzae* pathotype *Oryza*) originated via a host shift from millet onto rice ~7 000 years ago during rice domestication in China (Couch et al. 2005). More recent phylogenetic analyses combined preexisting biological and morphological data to re-examine the relationships among pyricularia-like species. These comprehensive studies favoured the classification of new *Pyricularia* species and other relevant changes within the order *Magnaporthales* (Luo & Zhang 2013, Klaubauf et al. 2014, Murata et al. 2014). Most relevant for agricultural scientists is that despite the differentiation between the *Oryzae* and *Triticum* pathotypes of *P. oryzae* reported extensively in the literature, these two pathotypes were kept under the same species name *P. oryzae*.

The *Oryzae* and *Triticum* pathotypes of *P. oryzae* from Brazil display a level of differentiation comparable to that reported between accepted species such as *P. grisea* and *P. oryzae* (Couch & Kohn 2002, Couch et al. 2005), or the new cryptic species recently identified within *Pyricularia* (Hirata et al. 2007, Choi et al. 2013, Klaubauf et al. 2014). The first objective of this study was to determine whether the *Oryza* and *Triticum* pathotypes of *P. oryzae* are distinct species that should be given

different names. The second objective of this study was to describe a new *Pyricularia* species causing blast on wheat and other poaceous hosts in Brazil. We conducted phylogenetic analyses based on 10 housekeeping genes using sympatric populations of *Pyricularia* sampled from rice, wheat and other poaceous hosts in Brazil. We also conducted cultural, morphological, and pathogenic characterisation of the *Pyricularia* isolates to provide a complete description for each species.

## MATERIALS AND METHODS

### *Fungal isolates and DNA extraction*

A unique collection of 128 monoconidial isolates of *Pyricularia* spp. obtained in sympatry from the Brazilian wheat agro-ecosystem was analysed in this study (Table 1). *Pyricularia* spp. isolates were obtained from *Triticum aestivum* (N = 79), *Oryza sativa* (N = 23), *Avena sativa* (N = 5), *Cenchrus echinatus* (N = 3), *Cynodon* spp (N = 1), *Digitaria sanguinalis* (N = 4), *Elionurus candidus* (N = 2), *Echinochloa crusgalli* (N = 1), *Eleusine indica* (N = 1), *Rhynchelytrum repens* (N = 3), and *Urochloa* spp. (N = 6). Isolates recovered from wheat and other poaceous hosts located within or adjacent to sampled wheat plots were obtained from symptomatic leaf tissue in commercial wheat fields located in seven states in Brazil during 2012. A detailed description of wheat field sampling strategies was provided earlier (Castroagudín et al. 2015). The rice-derived isolates of *P. oryzae* were recovered from rice leaves, necks and panicles exhibiting typical rice blast symptoms, comprising a representative group including all races of *P. oryzae* subgroup *Oryza* prevalent in the major Brazilian rice growing areas (Maciel et al. 2014). The rice-derived isolates were provided by EMBRAPA-Rice and Beans, Santo Antônio de Goiás, Goiás, Brazil. The isolate collection is maintained at the Laboratory of Phytopathology,

UNESP-DEFERS Campus Ilha Solteira, São Paulo, Brazil. A duplicate of the collection is hosted at the Laboratory of Phytopathology, EMBRAPA-Wheat, Passo Fundo, Brazil. Specimens were deposited at Culture Collection Mycobank (URM) Prof. Maria Auxiliadora Cavalcanti, Federal University of Pernambuco, Recife, Brazil.

### ***DNA extraction, amplification and sequencing***

Genomic DNA was extracted from freeze-dried mycelia with the GenElute Plant Genomic DNA Miniprep Kit (Sigma-Aldrich, St. Louis, MO, USA), according to the specifications of the manufacturer. Partial sequences of 10 nuclear housekeeping loci previously used to characterise *Pyricularia* species (Carbone & Kohn 1999, Couch & Kohn 2002, Couch et al. 2005, Zhang & Zhao 2011) were included in the analyses. The loci amplified were: *ACT* (actin), *BAC6*, *βT-1* (beta-tubulin), *CAL* (calmodulin), *CH7-BAC7*, *CH7-BAC9*, *CHS1* (chitin synthase 1), *EF-1α* (translation elongation factor 1-alpha), *MPG1* (hydrophobin), and *NUT1* (nitrogen regulatory protein 1). The loci were amplified using PCR cycling conditions described previously (Carbone & Kohn 1999, Couch et al. 2005). Annealing temperatures were adjusted when needed (Table 2). The PCR primers used to amplify each locus are described in Table 2. The PCR products were purified and sequenced by Macrogen Inc. (Seoul, Korea) using the ABI Prism BigDye Terminator Cycle Sequencing Ready Reaction Kit in an ABI 3730xl automated sequencer (Applied Biosystems, Foster City, CA). Newly generated DNA sequences were deposited in the GenBank-NCBI (Table 1).

### ***Phylogenetic analyses***

The complete set of sequence data was obtained from 125 isolates of *Pyricularia*

spp., including two identified as *P. pennisetigena* (isolate 12.0.100, URM7372) and *P. grisea* (isolate 12.0.082, URM7371) from Brazil, which were used as outgroups. Sequence data from the 10 genes were assembled, aligned, and concatenated using Geneious R v. 9.0.5 (Biomatters, Auckland, New Zealand) for further phylogenetic analyses. For three isolates (12.0.642i, 12.0.007i and 12.0.012i), sequences for only six genes were obtained, so these isolates were not included in the phylogenetic analyses, but we were able to group these three isolates within the identified clusters using the informative genes *CH7-BAC9* and *MPG1*.

The phylogeny for the *Pyricularia* species was reconstructed through Bayesian inference using BEAST v1.8.2 and in-files created with the help of BEAUti (Drummond et al. 2012). The 10-gene data set was partitioned and modeled using the GTR nucleotide substitution model. Four independent runs were conducted using a strict clock and MCMC length was set to 100 M generations with sampling intervals every 1000 generations. Runs were assessed for convergence by looking at the estimated sample size (ESS) values for each parameter using the program Tracer v. 1.6 (Rambaut et al. 2014). Runs were conducted until ESS values exceeded 100 for all estimated parameters. Means and 95% highest posterior density (HPD) intervals for all runs and combined runs were calculated and plotted using Tracer v. 1.6 (Rambaut et al. 2014). Posterior sampled trees were reconstructed using TreeAnnotator v. 1.8.2. (Drummond et al. 2012) with the following parameters: burn-in 10 %, 0.50 posterior probability limit, maximum clade credibility target tree type, and mean node height. The Bayesian posterior probability support for each node was calculated. The tree was visualised with FigTree v. 1.4.2 (Institute of Evolutionary Biology, University of Edinburgh,

<http://tree.bio.ed.ac.uk/software/figtree>). The resulting tree and respective alignment were deposited into TreeBASE at [www.treebase.org](http://www.treebase.org) (<http://purl.org/phylo/treebase/phyloids/study/TB2:S19225?x-access-code=719feabe6c3db8b266c738544066950f&format=html>). Based on the phylogenetic results, the fixed differences across all loci among clusters were calculated (Tables 3, 4).

### ***Cultural characterisation***

To examine macroscopic features, a representative subgroup of 30 isolates (Table 1) were grown on Corn Meal Agar (CMA), Malt Extract Agar (MEA), Oatmeal Agar (OA), Potato Dextrose Agar (PDA), and Synthetic Nutrient-poor Agar (SNA). All media were prepared as previously described (Crous et al. 2009) and amended with streptomycin sulfate (INLAB, São Paulo, Brazil) 0.05 g/L, and chloramphenicol (INLAB, São Paulo, Brazil) 0.05 g/L.

Stored isolates were reanimated on PDA. For this assay, a 6-mm diam disk of colonized PDA from a 7-d-old re-activated culture was transferred to the centre of a Petri plate containing one of the media described above. Colony diameter and cultural features were assessed after 7 d of incubation at 25 °C under a 12 h dark/12 h fluorescent light regime, following the procedures described by Klaubauf et al. (2014). Three replicates were made for each isolate and the assay was conducted twice. For colony descriptions, isolates were grouped according to their clustering in the phylogenetic analysis. A general description representing the colony morphology of each group of isolates was recorded. In addition, one isolate from each group was chosen as representative of the group.



## ***Morphological characterisation***

The same subgroup of 30 isolates selected for the description of colony morphology was examined using bright field and electron microscopes to characterise fungal structures. Isolates were re-activated in CMA and incubated for 7 d at 25 °C in darkness. They were subsequently transferred to SNA with sterile barley seeds to induce sporulation and incubated for 3 wk at 25 °C under a 12 h dark/12 h fluorescent light regime. Samples were prepared following methods described previously (Bozzola & Russell 1999).

Observations were made with a Nikon SMZ25 stereo-microscope, and with a Zeiss Axio Imager 2 light microscope using differential interference contrast (DIC) illumination and a Nikon DS-Ri2 camera and software. The bright field images were taken with a Nikon SMZ1500 stereoscope microscope using NIS Elements D 3.2 software. The images plates were created on Corel Draw X7 software (Corel Corporation, Ottawa, Canada). Measurements and Scanning electron microscope (SEM) images and measurements were acquired on a Zeiss LEOEVO 40 microscope using SmartSem Zeiss software (Oberkochen, Germany) operating at 10 kV and 10 to 30 mm work distance. When possible, biometric data was obtained from 30 observations per fungal structure per isolate.

## ***Pathogenicity spectrum***

A subgroup of 18 isolates was tested for pathogenicity spectra in greenhouse assays on barley (*Hordeum vulgare*) cvs. BRS Korbel, signal grass (*Urochloa brizantha*) cvs. Piatã and Marandú, oats (*Avena sativa*) cvs. EMBRAPA 29 and IAPAR 61, rice (*Oryza sativa*) cv. IRGA 409, and wheat cv. Anahuac 75. Seeds of the different hosts

were planted in 10-cm-diam plastic pots filled with Tropstrato HT potting mix (Vida Verde, Mogi Mirim, São Paulo, Brazil). Fifteen seeds were planted per pot, and 15 d after seedling emergence pots were thinned to eight seedlings per pot for barley, signal grass, oats, and rice; and to five seedlings per pot for wheat. Pots were kept in the greenhouse under natural condition until inoculation and watered daily from the top. Plants were fertilised with NPK 10:10:10 granular fertilizer (N:P<sub>2</sub>O<sub>5</sub>:K<sub>2</sub>O, Vida Verde, Mogi Mirim, São Paulo, Brazil). Forty gram of NPK granular fertilizer was sprinkled across 100 pots 1 d after emergence. Fertilisation was repeated every 15 d until inoculation. In addition, rice plants were fertilised with a solution of 4 g/L FeSO<sub>4</sub>·7H<sub>2</sub>O (Dinâmica, Diadema, São Paulo, Brazil) once after emergence, with 1 L of solution applied to every 100 pots.

Isolates were recovered from long-term storage and reactivated on PDA plates. Then isolates were transferred either to OA plates (rice-derived isolates) or PDA plates (wheat and other isolates originating from poaceous hosts). Fifteen plates were prepared for each isolate. Plates were incubated for 15 d at 25 °C under a 12 h dark/12 h fluorescent light regime. Mycelium was gently scraped and washed with 3–5 mL of sterile distilled water amended with Tween 80 (two drops/L) to release the spores. Conidia concentration was quantified using a Neubauer counting chamber and adjusted to 1 x 10<sup>5</sup> spores/mL for inoculation.

Pathogenicity assays were conducted on seedlings, 1-mo-old plants at growth stage 14 (Zadocks et al. 1974) on all hosts, and on immature heads of 2-mo-old wheat plants at the beginning of anthesis in growth stage 60 (Zadocks et al. 1974). Spore suspensions (1 x 10<sup>5</sup> spores/mL) were uniformly applied either onto the adaxial leaf

surfaces or onto wheat heads until runoff. Fifty mL of spore suspension was used every 20 inoculated pots.

Inoculated pots were placed onto plastic trays and incubated in a plant growth chamber for 7 d at 26 °C (barley, oats, rice, and wheat) or 30 °C (signal grass). Plants were kept in the dark for the first 24 h, followed by a 12 h dark/12 h fluorescent light regime. Plants were watered every other day from the bottom to avoid cross-contamination. Humidifiers were used to insure that relative humidity would stay above 85 % within the chamber during the entire experiment. Temperature and relative humidity were recorded in the chamber using ITLOG80 Datalogger (Instrutemp, Belenzinho, São Paulo, Brazil). As negative controls, five pots of each host were mock-inoculated with sterile deionised water amended with Tween 80 at two drops/L, in each experimental replication.

Plants were examined for lesions 7 d after inoculation. For the seedling inoculation tests, disease severity index was calculated using an ordinal scale from 0 to 5 as previously described (Urashima et al. 2005). The disease severity index was determined according as follows: lesion type 0 = no visible reaction; 1 = minute, pinhead-sized spots; 2 = small brown to dark brown lesions with no distinguishable centres; 3 = small eyespot shaped lesions with grey centres; 4 = typical elliptical blast lesions with grey centres; 5 = completely dead plant. Index values 0, 1, and 2 were considered non-compatible and index values 3, 4 and 5 were considered compatible. When different types of lesions were found on a single leaf, the most abundant lesions were considered.

Disease severity on wheat heads was assessed following the procedure described by Maciel et al. (2014), calculating the percentage of each wheat head affected by blast using Assess v. 2.0 image analysis software (APS, St. Paul, Minnesota). Wheat head tissue was considered affected by blast when it was chlorotic and/or it was covered with pathogen spores. For each head, a picture from each side of the head was taken, and the percentage of affected area in the two pictures was averaged. Seedling and head inoculation experiments were conducted using a one-factor completely randomized unbalanced design. Five pots containing five (wheat) or eight (barley, signal grass, oats, and rice) plants in the seedling tests, or five non-detached heads in the wheat-head tests were inoculated with each of the 18 isolates. The seedling inoculation experiments were conducted twice. The head inoculation experiment was conducted six times, but only two randomly chosen replicates were used for further statistical analyses. For statistical analyses, isolates were grouped according to their phylogenetic clustering (i.e. based on the identified species and clusters).

Analyses of variance (ANOVA) were performed to evaluate the experiment (replicates) and *Pyricularia* species effects, and their interactions in the different inoculation tests. Analyses were performed independently for each host species. For non-parametric data (seedling inoculation tests) ANOVAs were conducted using the PROC NPAR1WAY procedure computed with the Wilcoxon rank-sum test and by calculating the Monte Carlo estimations for the exact  $p$ -values ( $P$ ) with the EXACT/MC statement, at  $\alpha = 0.01$ . Dunn all pairs for joint ranks test was used for non-parametric means comparisons. In the seedlings inoculation experiment, replicates were not significantly different (exact  $P \geq 0.05$ ), thus the two replicates were

combined for these analyses. For parametric data (wheat heads inoculation tests) ANOVAs were conducted with the PROC GLM procedure, considering species as fixed factors and isolates as random factors nested inside species factors. Fisher's protected least significant difference (LSD) test was used for comparison of disease severity means for species, at  $\alpha = 0.05$ . Since the experiment was unbalanced, the harmonic cell size was used to calculate the average LSD. The interaction between species and experiment replicate was statistically significant ( $P = 0.017$ ), therefore the two replicates of the experiment were analysed independently. All statistical analyses were performed with Statistical Analysis System program, v. 9.4 (SAS Institute, Cary, North Carolina)

## RESULTS

### *Phylogenetic Analyses*

The final alignment for partial sequences of the 10 housekeeping loci had a total length of 3 387 bases (3 301 un-gapped bases) from 125 taxa including sequences retrieved from Brazilian isolates of *P. grisea* and *P. pennisetigena* used as outgroups. A total of 552 polymorphic sites were found, with 522 non-fixed mutations. This resulted in 109 multilocus haplotypes for the 125 taxa (87 % of isolates had a unique multilocus haplotype).

The Bayesian analysis grouped the isolates into two major phylogenetic clusters (I and II) with strong Bayesian posterior probabilities ( $P = 0.99$ ). Cluster I contained isolates originating from wheat as well as from another Poaceae ( $P = 0.98$ ). Isolates of Cluster I were further subdivided into two clades without high posterior Bayesian support ( $P = 0.64$ ). Cluster II was sub-divided into three host-associated clades.

Clade 1 contained isolates obtained from wheat and isolate 12.0009i obtained from signal grass plants invading a wheat field in Paraná state. Clade 2 contained exclusively wheat-derived isolates, and Clade 3 comprised isolates associated only with rice. Our interpretation was that Cluster I and Cluster II corresponded to two distinct species: *Pyricularia graminis-tritici* sp. nov. (Pgt), newly described in this study, and *Pyricularia oryzae* (Po). The host-associated clades found in *P. oryzae* (Cluster II) corresponded to *P. oryzae* pathotype *Triticum* (PoT; Clade 1 and Clade 2), and *P. oryzae* pathotype *Oryza* (PoO; Clade 3) (Fig. 1).

Fixed nucleotide differences among the identified phylogenetic groups were examined for each locus. Six of the 10 loci (*ACT*, *BAC6*, *CAL*, *CH7-BAC7*, *CHS1* and *NUT1*) did not show any fixed nucleotide differences among the isolates of *P. graminis-tritici* sp. nov. and *P. oryzae*. On the other hand, *βT-1*, *CH7-BAC9*, *EF-1α* and *MPG1* loci showed a total of 30 (0.89 %) fixed differences across *Pyricularia* species (Tables 3, 4).

The two groups of isolates within Pgt differed for only eight fixed mutations at locus *CH7-BAC9*. The differences presented according to nucleotide position and fixed nucleotide character (in parenthesis) were: 61 (A), 77 (A), 82 (C), 86 (A), 140 (T), 161 (T), 258 (C) and 259 (A). The separation between these two groups of Pgt was not supported by Bayesian posterior probability ( $P = 0.64$ ); thus, for further comparisons with the other *Pyricularia* species, these two groups of Pgt were collapsed.

*Pyricularia graminis-tritici* could be distinguished from PoT Clade 1 by 17 differences at *MPG1*. These fixed differences were at the following positions: 7 (T), 10 (C), 13 (T), 14 (C), 20 (A), 22–25 (CCAG), 27 (C), 33–34 (CA), 36 (A), 41–42 (AG), 47 (C) and 87 (C). Furthermore, Pgt was distinguished from PoT Clade 2 by the following 16 differences at *MPG1*: 4 (T), 10 (C), 13 (T), 14 (C), 20 (A), 22–25 (CCAG), 27 (C), 33–34 (CA), 41–42 (AG), 46 (C) and 87 (C). Likewise, Pgt was distinguished from PoO by one fixed difference at  $\beta T-1$ : 338 (A), one at *CH7-BAC9*: 20 (C), one at *EF-1 $\alpha$* : 325 (T) and 15 fixed differences at *MPG1*, as follows: 4 (T), 10 (C), 13 (T), 14 (C), 20 (A), 22–25 (CCAG), 27 (C), 33–34 (CA), 41–42 (AG), and 87 (C).

*Pyricularia oryzae* pathotype *Triticum* Clades 1 and 2 differed only in five fixed mutations at the *MPG1* locus, as follows: 4 (T), 7 (C), 36 (T), and 46–47 (TT). PoT Clade 1 was differentiated from PoO by one nucleotide at *CH7-BAC9*: 20 (C), one at *EF-1 $\alpha$* : 325 (T), and four differences at *MPG1*: 4 (T), 7 (C), 36 (T), and 47 (T). The PoT Clade 2 was differentiated from PoO by one position at  $\beta T-1$ : 338 (A), one at *CH7-BAC9*: 20 (C), *EF-1 $\alpha$* : 325 (T) and one at *MPG1*: 46 (C).

Isolates 12.0.642i, 12.0.007i and 12.0.012i were not included in the phylogenetic analyses. But based on their sequences for *CH7-BAC9* and *MPG1*, isolate 12.0.642i belonged to Pgt, and isolates 12.0.007i and 12.0.012i belonged to PoT Clade 1. Due to the low level of fixed differences between PoT Clades 1 and 2, and PoO (0.12 to 0.18 % of the total positions), sequencing a larger number of loci or a genome-scale sequencing will be needed to determine if the two pathotypes of *P. oryzae* correspond to two populations of one species or to two different sister species.

### ***Cultural and morphological characterisation.***

For description of cultural and morphologic characteristics, isolates of *Pyricularia* spp. were grouped according to their phylogenetic placement, following the species and subgroups assignment, namely *P. graminis-tritici* sp. nov. (Pgt), *P. oryzae* pathotype *Triticum* (PoT) and *P. oryzae* pathotype *Oryza* (PoO).

In general, similar colony morphologies were observed for isolates of Pgt, PoT, and PoO on the five media tested. However, in CMA isolates of PoO formed pale–grey aerial mycelium that was not observed in any isolate of Pgt or PoT. No morphological differences were observed among the *Pyricularia* species. We describe later in the taxonomy section the cultural and morphological characteristics observed for *Pyricularia graminis-tritici* and *Pyricularia oryzae* pathotypes *Triticum* and *Oryza*.

### ***Pathogenicity spectrum of Pyricularia spp. on wheat, barley, signal grass, oats and rice***

The replicates of the seedling inoculation tests were combined due to the lack of species x replicates interactions (Table 5). *Pyricularia* species caused symptoms that ranging from hypersensitive response lesions composed of diminutive, 1-mm brown spots, to typical elliptical blast lesions with grey centres (> 5 mm diam), usually coalescing and causing plant death on all hosts (Kato et al. 2000, Cruz et al. 2016) (Fig. 5–7). This virulence variation was observed even among isolates of the same *Pyricularia* species, indicating the presence of host-physiological race interactions. For all tests, host seedlings used as negative controls showed no blast lesions on their leaves (mean disease index (DI) = 0.00).



Inoculation tests on seedlings of wheat cv. Anahuac 75 showed significant differences among *Pyricularia* species in pathogenicity (mean disease index, DI) ( $P > \chi^2 < 0.0001$ ). Seedlings were highly susceptible to isolates of PoT Clades 1 and 2 (DIs of 4.62 and 4.15, respectively) and to Pgt (DI= 4.09). In addition, isolates of PoO caused lesions on wheat seedlings (DI = 2.00). However, conspicuous differences were observed in the levels of virulence of isolates of this group (Table 5). Isolates 8762 and 10659 sporadically produced lesion types 1, 2 and 3, whereas isolates 678 and 10880 consistently produced lesion type 4 (Fig. 5a).

Seedlings of barley cv. BRS Korbell did not show significant differences in their susceptible response to the inoculated *Pyricularia* species ( $P > \chi^2 = 0.8748$ ). All species were highly virulent on this host (DIs  $\geq 3.82$ ), showing that barley is very susceptible to both wheat and rice blast pathogens (Fig. 5b).

Inoculations on signal grass seedlings showed that cv. Marandú was more susceptible to *Pyricularia* species than cv. Piatá. On cv. Marandú, PoT Clade 2 showed the highest level of virulence (DI = 2.90), which was significantly different from PoT Clade 1 (DI = 1.76) and Pgt (DI = 1.75). PoO was not pathogenic on this cultivar (DI = 0.18). On the other hand, none of the four groups of isolates were pathogenic on signal grass cv. Piatá (DIs ranged from 0.21 to 0.52, which were not significantly different at  $P > \chi^2 = 0.2886$ ) (Fig. 5c, d).

Inoculation tests on oats showed similar seedling reactions for both cvs. EMBRAPA 29 and IAPAR 61. In all cases, Pgt and PoT Clades 1 and 2 had the higher levels of aggressiveness with DIs  $> 2.5$ . However, differences in the level of aggressiveness

of individual isolates of these species were statistically significant. The most aggressive isolates on oats cv. EMBRAPA 29 were 12.0.534i (Pgt), 12.1.169 (PoT Clade 1) and 12.1.119 (PoT Clade 2), and the least aggressive isolates were 12.0.607i (Pgt), 12.1.032i (PoT Clade 1) and 12.1.291 (PoT Clade 2). Likewise, on cv. IAPAR 61 the most aggressive isolates were 12.0.607i (Pgt), 12.1.158 (PoT Clade 1) and 12.1.119 (PoT Clade2), and the least aggressive isolates were 12.0.642i (Pgt), 12.0.009i (PoT Clade 1) and 12.1.291 (PoT Clade 2). Isolates of PoO showed the lowest level of aggressiveness on oats (DI = 1.28 on cv. EMBRAPA 29, and 0.85 on cv. IAPAR 61), significantly different from the other three groups. Differences in virulence among isolates of PoO were significant only on cv. IAPAR 61, on which isolate 10659 was the most aggressive while isolate 8762 was not pathogenic (Fig. 5e, f).

Inoculation tests on rice seedlings showed generally low levels of disease severity. Pgt and PoT Cluster 1 and 2 were not pathogenic on rice. On cultivar IRGA 409, PoO was pathogenic with a mean DI = 1.80. PoO isolates showed a wide range of aggressiveness. Whereas isolates 8762 and 10880 consistently produced type 3 lesions and sporadically type 4 lesions, isolate 678 produced type 2 lesions and isolate 10659 sporadically produced type 2 lesions or no lesions at all on cv. IRGA 409 (Fig. 5h). This variation in virulence is consistent with race-cultivar interactions. A significant interaction between species x replicate was observed in the wheat head inoculation tests ( $P = 0.02$ ). Therefore, statistical analyses of the two test replicates were conducted independently (Table 6, Fig. 6, 7). The mean disease indexes obtained for PoT and PoO were higher in the second experiment; nevertheless, results from both experiments were congruent. All four species tested were

pathogenic on heads of wheat cv. Anahuac 75 and significant differences were found in their levels of aggressiveness ( $P < 0.0001$  for experiment 1, and  $P = 0.0370$  for experiment 2). Pgt and PoT Clade 1 were the most aggressive, followed by PoT Clade 2 (Table 6). Isolates of PoO were able to infect wheat heads, but the disease did not progress to more than 10 % of the head of cv. Anahuac 75. However, similar to the seedling inoculation tests, PoO isolate 10880 was very aggressive on wheat heads, infecting 20–60 % of the inoculated heads (mean DI = 33.39 %; Fig. 6, 7).

## TAXONOMY

***Pyricularia graminis-tritici*** V.L. Castroagudín, S.I. Moreira, J.L.N. Maciel, B.A. McDonald, P.W. Crous & P.C. Ceresini, *sp. nov.* — MycoBank MB816086; Fig. 2

*Etymology.* Referring to the major association of this fungal species with multiple grasses, and to the most common cultivated species this fungal species infects causing blast, *Triticum aestivum*.

On SNA on sterile barley seeds — *Mycelium* consisting of smooth, hyaline, branched, septate hyphae, 2–3 µm diam. *Conidiophores* solitary, erect, straight or curved, unbranched, 1–5-septate, medium brown, smooth, (14–)125(–255) × (1–) 3.5(–6) µm. Abundant conidiogenesis observed on the top half of the conidiophore.

*Conidiogenous cells* 50–80(–170) × 3–5 µm, terminal and intercalary, pale brown, smooth, forming a rachis with sympodial proliferation, with several protruding denticles, 1–2 µm long, 1.5–2 µm diam. *Conidia* solitary, pyriform to obclavate, pale brown, finely verruculose, granular to guttulate, 2-septate, (23–)25–29(–32) × (8–)9(–10) µm; apical cell 10–13 µm long, basal cell 6–9 µm long; hilum truncate, protruding, 1–1.5 µm long, 1.5–2 µm diam, unthickened, not darkened; central cell turning dark brown with age. *Chlamydospores* and *microconidia* not observed.

Culture characteristics — Colonies on CMA with moderate black aerial mycelium, irregular margins, reaching up to 6.5 cm diam after 1 wk; reverse pale grey. Colonies on MEA with abundant white aerial mycelium, and pale grey sporulation at the centre; reaching up to 7.6 cm diam after 1 wk; reverse black; sometimes, fewer colonies (5.1 cm diam) with dark grey sporulation at centre and abundant white aerial mycelium at margins. Colonies on OA with dark grey sporulation in concentric circles, with sparse margins, up to 5.8 cm; reverse pale grey; sometimes, larger growth with abundant white aerial mycelium, pale grey at the centre. Colonies on PDA with abundant white aerial mycelium, olivaceous at centre, growth in concentric circles, up to 6.5 cm diam; reverse black in centre with white margins. Colonies on SNA with sparse olivaceous mycelium irregular margins, up to 5.2 cm diam; reverse olivaceous.

*Typus.* BRAZIL, Paraná, isolated from leaves of *Eleusine indica*, 2012, J.N. Maciel (holotype URM7365, culture-ex-type = isolate 12.0.534i).

*Specimens examined.* BRAZIL, Mato Grosso do Sul, isolated from leaves of *Elionorus candidus*, 2012, J. N. Maciel (URM7377 = 12.0.194); Mato Grosso do Sul, isolated from leaves of *Echinochloa crusgalli*, 2012, J.N. Maciel (URM7381 = 12.0.326); Mato Grosso do Sul, isolated from leaves of *Avena sativa*, 2012, J.N. Maciel (URM7366 = 12.0.345); Mato Grosso do Sul, isolated from leaves of *Urochloa spp.*, 2012, J.N. Maciel (URM7367 = 12.0.366); Paraná, isolated from leaves of *Digitaria sanguinalis*, 2012, J.N. Maciel (URM7376 = 12.0.555i); Paraná, isolated from leaves of *Cynodon spp.*, 2012, J.N. Maciel (URM7375 = 12.0.578i); Paraná, isolated from leaves of *Rhynchelytrum repens*, 2012, J.N. Maciel (URM7384 = 12.0.607i); Paraná, isolated from leaves of *Cenchrus equinatus*, 2012, J.N. Maciel (URM7378 = 12.0.642i); Goiás, isolated from leaves of *Triticum aestivum*, 2012, J.N. Maciel (URM7380 = 12.1.037); Rio Grande do Sul, isolated from leaves of *T. aestivum*, 2012, J.N. Maciel (URM7387 = 12.1.191).

Notes — *Pyricularia graminis-tritici* causes blast disease on *Triticum aestivum*, *Avena sativa*, *Hordeum vulgare* and *Urochloa brizantha* but not on *Oryza sativa*.

Based on morphological and cultural comparisons, isolates of *P. graminis-tritici* are indistinguishable from those of *P. oryzae* pathotypes *Oryza* and *Triticum*. However, these taxa are readily distinguished based on their DNA phylogeny, host range and pathology. Sequencing of the MPG1 gene is a diagnostic tool to distinguish *P. graminis-tritici* from *P. oryzae*.

***Pyricularia oryzae*** Cava, Fung. Long. Exsicc. 1: no. 49. 1891.

= *Magnaporthe oryzae* B.C. Couch, Mycologia 94: 692. 2002.

***Pyricularia oryzae* pathotype *Triticum*** (Kato et al. 2000); Fig. 3

On SNA on sterile barley seeds — *Mycelium* consisting of smooth, hyaline, branched, septate hyphae, 2–3 µm diam. *Conidiophores* were (21–)166(–340) × (25–)4(–6) µm. The sporulation pattern within the species showed abundant conidiogenesis over almost the entire length of conidiophores, ranging from 50–90 % of the conidiophore length. The *conidiogenous cells* were terminal and intercalary, sympodial, with several protruding *denticles*, 1–3 µm long, 1–1.5 µm diam at the apical cell, and an enlarged basal cell. *Conidia* were pyriform, pale brown, 2-septate, (9.5–)16(–24) × (2.5–)5.5(–8.5) µm; *apical cell* (2.5–)6.5(–12.5) × (1–)2.5(–5) µm, *basal cell* (1.5–)4.5(–7) × (2–)4(–7) µm; *hilum* 0.5–2.5 µm long. *Chlamydospores* and *microconidia* not observed.

Culture characteristics — On CMA colonies with moderate black aerial mycelium with irregular margins, sometimes with black aerial mycelium with sporulation in concentric circles, or sparse white mycelial colonies, reaching up to 5.9 cm diam after 1 wk; reverse black with brown margins. On MEA, colonies presented different forms: cottony white aerial mycelia within concentric growth, sometimes with a grey sporulation at the centre, reaching up to 6.9 cm diam after 1 wk; reverse black. Colonies on OA with grey aerial mycelium and sporulation in

concentric circles; sometimes surface mycelia were white or cream, showing concentric growth up to 7.9 cm diam; reverse pale grey; sometimes, larger growth with abundant white aerial mycelium, pale grey at the centre. PDA colonies exhibited many variations in culture, often with concentric growth: abundant white aerial mycelia and pale grey sporulation at centre; abundant white aerial mycelia; or dark grey mycelia at the bottom, with white aerial mycelia up to 7 cm diam; reverse black in centre with olivaceous margins. On SNA the colonies with dark brown centres with sparse pale brown margins; or pale grey at the centre and sparse pale brown margins; reverse dark brown to black at the centre and with pale brown margins.

*Specimens examined.* BRAZIL, Paraná, isolated from leaves of *Urochloa spp.*, 2012, J.N. Maciel (URM7385 = 12.0.009i); Mato Grosso do Sul, isolated from leaves of *Triticum aestivum*, 2012, J.N. Maciel (URM7388 = 12.1.132); Mato Grosso do Sul, isolated from leaves of *T. aestivum*, 2012, J.N. Maciel (URM7368 = 12.1.158); Mato Grosso do Sul, isolated from leaves of *T. aestivum*, 2012, J.N. Maciel (URM7386 = 12.1.169); Rio Grande do Sul, isolated from leaves of *T. aestivum*, 2012, J.N. Maciel (URM7389 = 12.1.205); Paraná, isolated from leaves of *T. aestivum*, 2012, J.N. Maciel (URM7369 = 12.1.291).

#### ***Pyricularia oryzae* pathotype *Oryza* (Kato et al. 2000); Fig. 4**

On SNA on sterile barley seeds. — *Mycelium* consisting of smooth, hyaline, branched, septate hyphae, 2–3 µm diam. *Conidiophores* were (70.5–)146.5(–247) x (3.5–)4.5(–5.5) µm, solitary, erect, straight or curved, septate, medium brown. Sometimes, the conidiophores were branched. Frequent sporulation was observed in the apical *conidiogenous cells*, intercalary conidiogenesis was also present, with protruding *denticles* 0.9–1.1 µm long. *Conidia* pyriform to obclavate, narrowed toward tip, rounded at the base, 2-septate, hyaline to pale olivaceous, (9.7–)16.9(–32.2) x (3.5–)6.8(–15.6) µm; *apical cell* (2.7–)6.4(–14) x (2.5–)1.4(–4.2) µm, *basal cell* (2.1–)5(–13) x (2.2–)4(–9.5) µm; *hilum* 0.8–1.4 µm long. *Chlamydospores* and

*microconidia* not observed.

*Specimens examined.* BRAZIL, Goiás, isolated from leaves of *Oryzae sativa*, 2006, *Unknown* (URM7379 = 678); Tocantins, isolated from leaves of *Oryzae sativa*, 2007, *Unknown* (URM7383= 704); Central Brazil, isolated from leaves of *Oryzae sativa*, 2013, *Unknown* (URM7382 = 8762); Central Brazil, isolated from leaves of *Oryzae sativa*, 2013, *Unknown* (URM7370 = 10880).

**Culture characteristics** — On CMA the predominant colony morphology was the moderate pale grey aerial mycelium with brown margins reaching up to 5.6 cm diam after 1 wk; reverse black centre and brown edges; fewer colonies with regular margin formed by sparse white aerial mycelia; sometimes, moderate black aerial mycelium with irregular margins; or white aerial mycelium. Colonies on MEA were often pale grey, sporulation in concentric circles, with dark grey margins; sometimes dark grey at the bottom with sparse white aerial mycelia; or white colonies with regular margins, dark grey at the centre, reaching up to 7.6 cm diam after 1wk; reverse black. On OA colonies with dark-grey sporulation at centre and regular margins of white aerial mycelia up to 7.3 cm. PDA colonies were variable, with dark grey growth in concentric circles, sometimes pale grey or olivaceous; in some cases, with regular margins of white mycelia, reaching up to 6.4 cm; reverse black. On SNA colonies with pale brown or dark brown mycelia, with sparse margins; in rare cases with abundant pale grey aerial mycelia at centre and white mycelia in regular margins, up to 3.1 cm; reverse black in centre and olivaceous at the borders.

## DISCUSSION

We conducted comprehensive phylogenetic, morphological and pathogenicity analyses to characterise *Pyricularia* isolates associated with the blast disease on rice, wheat and other poaceous hosts from the Brazilian agro-ecosystem. Since

1998, Urashima and Kato demonstrated that the blast pathogens infecting wheat and rice were distinct. These authors also reported that isolates recovered from wheat did not infect rice and that most isolates recovered from rice did not infect wheat, except for a few isolates capable of producing small leaf lesions. Although Urashima and Kato (Urashima et al. 1993) and several follow-up studies demonstrated that the wheat and rice pathogens were different, they were still considered subgroups of the same species: *Pyricularia grisea* (Urashima & Kato 1998, Kato et al. 2000, Murakami et al. 2000), now called *P. oryzae* (Couch & Kohn 2002). The results of our Bayesian phylogenetic analyses based on ten housekeeping genes indicate that isolates causing wheat blast can be separated into two phylogenetic clusters with a high posterior probability ( $P = 0.99$ ). *Pyricularia graminis-tritici* sp. nov. and *P. oryzae* (Fig. 1) represent two distinct species. *Pyricularia graminis-tritici* sp. nov. is described and named for the first time in this study.

We also found that the two host-associated clades in *P. oryzae* corresponded to different pathotypes, but our analyses did not clearly separate *P. oryzae* pathotype *Triticum* and *P. oryzae* pathotype *Oryza* into two distinct *Pyricularia* species. Therefore, we suggest to maintain the pathotype-based denomination system proposed for *P. oryzae* by Kato and collaborators (Kato et al. 2000). Here, we considered Clades 1 and 2 from our phylogenetic reconstruction to be *P. oryzae* pathotype *Triticum*, with these clades composed almost exclusively of wheat-derived isolates that group into the same main cluster as the rice blast pathogen. Likewise, the denomination of *P. oryzae* pathotype *Oryza* should be maintained for the cluster containing exclusively rice-associated isolates. Further sequencing of other loci or a population genomics approach will be needed to determine if these two pathotypes



of *P. oryzae* are actually cryptic species that should be separated and named accordingly.

The fixed nucleotide differences among the *Pyricularia* species found in this study were located in four loci: *βT-1*, *CH7-BAC7*, *EF-1α* and *MPG1*. Among these, *MPG1* showed the highest number of fixed differences (19 sites), and a different sequence haplotype for each of the *Pyricularia* species, as well as for the two clades of *P. oryzae* pathotype *Triticum*. Hence, sequencing the *MPG1* locus can provide a simple and informative tool to establish the identity of a *Pyricularia* isolate at the species level.

Under our experimental conditions, *P. graminis-tritici* sp. nov., and *P. oryzae* pathotypes *Oryza* and *Triticum* did not present morphological or cultural differences. However, distinctive pathogenicity spectra were observed. *P. graminis-tritici* and *P. oryzae* pathotypes *Triticum* and *Oryza* caused blast symptoms on wheat, barley, and oats with different levels of aggressiveness. These findings agree with Urashima's pioneering observation that two different pyricularia-like pathogens caused wheat blast disease in Brazil (Urashima et al. 2005). Furthermore, our results confirmed that isolates of *P. oryzae* pathotype *Oryza* can cause blast on seedlings and heads of wheat under greenhouse conditions that favour infection, as previously reported (Urashima et al. 1993, Urashima & Kato 1998). An important question that remains to be answered is whether compatible interactions also occur under field conditions. In conclusion, our study demonstrated that blast disease on wheat and other Poaceae in Brazil is a complex disease caused by more than one species of *Pyricularia*. In addition, a recent analysis performed by D. Croll showed that the

Bangladeshi wheat blast strain responsible for the 2016 outbreak are closely related to strains of *Pyricularia graminis-tritici* collected in Brazilian wheat fields (Callaway 2016). Given these findings, recognising and properly naming the causal agents of wheat blast will not only increase our understanding of the biology and epidemiology of the disease, but will also enable the establishment of proper quarantine regulations to limit the spread of these pathogens into disease-free areas that grow susceptible wheat cultivars, including Europe, and North America.

**Acknowledgements.** This work was funded by a FAPESP (São Paulo Research Foundation, Brazil) research grant to P. C. Ceresini (2013/10655-4 and 2015/10453-8), an EMBRAPA/Monsanto research grant (Macroprogram II) to J. L.N. Maciel. V. L. Castroagudin is supported by a Post-Doctorate research fellowship from FAPESP (2014/25904-2).

## REFERENCES

- Anjos JRND, Silva DBD, Charchar MJD, et al. 1996. Ocurrance of blast fungus (*Pyricularia grisea*) on wheat and rye in the savanna region of Central Brazil. Pesquisa Agropecuária Brasileira 31: 79–82.
- Bozzola JJ, Russell LD. 1999. Electron microscopy: principles and techniques for biologists. Boston: Jones and Bartlett Publishers. p. 670.
- Callaway E. 2016. Devastating wheat fungus appears in Asia for first time. Nature 532: 421-422.
- Carbone I, Kohn LM. 1999. A method for designing primer sets for speciation studies in filamentous ascomycetes. Mycologia 91: 553–556.
- Castroagudin VL, Ceresini PC, Oliveira SC, et al. 2015. Resistance to QoI fungicides is widespread in Brazilian populations of the wheat blast pathogen *Magnaporthe oryzae*. Phytopathology 104: 284–294.
- Choi J, Park S-Y, Kim B-R, et al. 2013. Comparative analysis of pathogenicity and phylogenetic relationship in *Magnaporthe grisea* species complex. PLoS ONE: 8(2): e57196. doi:57110.51371/journal.pone.0057196.
- Couch BC, Fudal I, Lebrun MH, et al. 2005. Origins of host-specific populations of the blast pathogen *Magnaporthe oryzae* in crop domestication with subsequent expansion of pandemic clones on rice and weeds of rice. Genetics 170: 613–630.

- Couch BC, Kohn LM. 2002. A multilocus gene genealogy concordant with host preference indicates segregation of a new species, *Magnaporthe oryzae*, from *M. grisea*. *Mycologia* 94: 683–693.
- Crous PW, Verkley GJM, Groenwald JZ, et al. 2009. Fungal Biodiversity. Utrecht, The Netherlands: CBS-KNAW Fungal Biodiversity Centre. p. 1–269.
- Cruz MFA, Rios JA, Araujo L, et al. 2016. Infection process of *Pyricularia oryzae* on leaves of wheat seedling. *Tropical Plant Pathology* DOI 10.1007/s40858-016-0068-6.
- Drummond AJ, Suchard MA, Xie D, et al. 2012. Bayesian phylogenetics with BEAUti and the BEAST 1.7. *Molecular Biology and Evolution* 29: 1969–1973.
- Duveiller E, Hodson D, Tiedmann A. 2010. Wheat blast caused by *Magnaporthe grisea*: a reality and new challenge for wheat research. *INTERNATIONAL WHEAT CONFERENCE*, 8: 247–248.
- Duveiller E, Singh RP, Nicol JM. 2007. The challenges of maintaining wheat productivity: pests, diseases, and potential epidemics. *Euphytica* 157: 417–430.
- Farman ML. 2002. *Pyricularia grisea* isolates causing gray leaf spot on perennial ryegrass (*Lolium perenne*) in the United States: relationship to *P. grisea* isolates from other host plants. *Phytopathology* 92: 245–254.
- Hamer JE. 1991. Molecular probes for rice blast disease. *Science* 252: 632–633.
- Hirata K, Kusba M, Chuma I, et al. 2007. Speciation in *Pyricularia* inferred from multilocus phylogenetic analysis. *Mycological Research* 111: 799–808.
- Igarashi S, Utimada CM, Igarashi LC, et al. 1986. *Pyricularia* em trigo. 1. Ocorrência de *Pyricularia* spp. no estado do Paraná. *Fitopatologia Brasileira* 11: 351–352.
- Kato H, Yamamoto M, Yamaguchi-Ozaki T, et al. 2000. Pathogenicity, mating ability and DNA restriction fragment length polymorphisms of *Pyricularia* populations isolated from *Gramineae*, *Bambusideae* and *Zingiberaceae* plants. *Journal of General Plant Pathology* 66: 30–47.
- Klaubauf S, Tharreau D, Fournier E, et al. 2014. Resolving the polyphyletic nature of *Pyricularia* (*Pyriculariaceae*). *Studies in Mycology* 79: 85–120.
- Kohli MM, Mehta YR, Guzman E, et al. 2011. *Pyricularia* blast - a threat to wheat cultivation. *Czech Journal of Genetics and Plant Breeding* 47: S130–S134.
- Lima MIP, Minella E. 2003. Occurrence of head blast in barley. *Fitopatologia Brasileira* 28: 207.
- Luo J, Zhang N. 2013. *Magnaporthiopsis*, a new genus in *Magnaporthaceae* (*Ascomycota*). *Mycologia* 105: 1019–1029.
- Maciel JLN. 2011. *Magnaporthe oryzae*, the blast pathogen: current status and options for its control. *Plant Science Reviews* 2011: 233–240.
- Maciel JLN, Ceresini PC, Castroagudin VL, et al. 2014. Population structure and pathotype diversity of the wheat blast pathogen *Magnaporthe oryzae* 25 years after its emergence in Brazil. *Phytopathology* 104: 95–107.
- Murakami J, Tomita R, Kataoka T, et al. 2003. Analysis of host species specificity of *Magnaporthe grisea* toward foxtail millet using a genetic cross between isolates from wheat and foxtail millet. *Phytopathology* 93: 42–45.
- Murakami J, Tosa Y, Kataoka T, et al. 2000. Analysis of host species specificity of *Magnaporthe grisea* toward wheat using a genetic cross between isolates from wheat and foxtail millet. *Phytopathology* 90: 1060–1067.
- Murata N, Aoki T, Kusaba M, et al. 2014. Various species of *Pyricularia* constitute a robust clade distinct from *Magnaporthe salvinii* and its relatives in *Magnaporthaceae*. *Journal of General Plant Pathology* 80: 66–72.

- Rambaut A, Suchard MA, Xie D, et al. 2014. Tracer v1.6, Available from <http://beast.bio.ed.ac.uk/Tracer>.
- Silue DJ, Nottéghem JL, Tharreau D. 1992. Evidence for a gene-for-gene relationship in the *Oryza sativa-Magnaporthe grisea* pathosystem. *Phytopathology* 82: 577–580.
- Silva CP, Nomura E, Freitas EG, et al. 2009. Efficacy of alternative treatments in the control of *Pyricularia grisea* on wheat seeds. *Tropical Plant Pathology* 34: 127–131.
- Takabayashi N, Tosa Y, Oh HS, et al. 2002. A gene-for-gene relationship underlying the species-specific parasitism of *Avena/Triticum* isolates of *Magnaporthe grisea* on wheat cultivars. *Phytopathology* 92: 1182–1188.
- Taylor JW, Jacobson DJ, Kroken S, et al. 2000. Phylogenetic species recognition and species concepts in fungi. *Fungal Genetics and Biology* 31: 21–32.
- Tosa Y, Chuma I. 2014. Classification and parasitic specialization of blast fungi. *Journal of General Plant Pathology* 80: 202–209.
- Tosa Y, Hirata K, Tamba H, et al. 2004. Genetic constitution and pathogenicity of *Lolium* isolates of *Magnaporthe oryzae* in comparison with host species-specific pathotypes of the blast fungus. *Phytopathology* 94: 454–462.
- Tosa Y, Tamba H, Tanaka K, et al. 2006. Genetic analysis of host species specificity of *Magnaporthe oryzae* isolates from rice and wheat. *Phytopathology* 96: 480–484.
- Urashima AS, Galbieri R, Stabili A. 2005. DNA fingerprinting and sexual characterization revealed two distinct populations of *Magnaporthe grisea* in wheat blast in Brazil. *Czech Journal of Genetics and Plant Breeding* 41: 238–245.
- Urashima AS, Hashimoto Y, Don LD, et al. 1999. Molecular analysis of the wheat blast population in Brazil with a homolog of retrotransposon MGR583. *Annals of the Phytopathological Society of Japan* 65: 429–436.
- Urashima AS, Igarashi LC, Kato H. 1993. Host range, mating type, and fertility of *Pyricularia grisea* from wheat in Brazil. *Plant Disease* 77: 1211–1216.
- Urashima AS, Kato H. 1998. Pathogenic relationship between isolates of *Pyricularia grisea* of wheat and other hosts at different host developmental stages. *Fitopatologia Brasileira* 23: 30–35.
- Valent B, Chumley FG. 1991. Molecular genetic analysis of the rice blast fungus, *Magnaporthe grisea*. *Annual Review of Phytopathology* 29: 443–467.
- Valent B, Khang CH. 2010. Recent advances in rice blast effector research. *Current Opinion in Plant Biology* 13: 434–441.
- Verzignassi RS, S. PL, Benchimol RL, et al. 2012. *Pyricularia grisea*: new pathogen on *Brachiaria brizantha* cv. Marandu in Pará. *Summa Phytopathologica* 38: 254.
- Zadocks JC, Chang TT, Konzak CF. 1974. A decimal code for the growth stages of cereals. *Weed Research* 14: 415–421.
- Zhang N, Zhao S. 2011. A six-gene phylogeny reveals the evolution of mode of infection in the rice blast fungus and allied species. *Mycologia* 103: 1267–1276.

**Table 1** Details of isolates of *Pyricularia* spp. used in this study and NCBI Accession numbers

| Species,<br>isolate                        | Race           | Host                         | Origin             | Sampling<br>year | NCBI GenBank Accession number |          |          |          |          |          |          |          |          |          |
|--------------------------------------------|----------------|------------------------------|--------------------|------------------|-------------------------------|----------|----------|----------|----------|----------|----------|----------|----------|----------|
|                                            |                |                              |                    |                  | ACT                           | BAC6     | βT-1     | CAL      | CH7-BAC7 | CH7-BAC9 | CHS      | EF-1α    | MPG1     | NUT1     |
| <i>Pyricularia graminis-tritici</i>        |                |                              |                    |                  |                               |          |          |          |          |          |          |          |          |          |
| 12.0.038i                                  | - <sup>c</sup> | <i>Urochloa</i> spp.         | Paraná             | 2012             | KU952115                      | KU952241 | KU952995 | KU952869 | KU952367 | KU952492 | KU953120 | KU953245 | KU952618 | KU952744 |
| 12.0.051i                                  | -              | <i>Rhynchelytrum repens</i>  | Paraná             | 2012             | KU952116                      | KU952242 | KU952996 | KU952870 | KU952368 | KU952493 | KU953121 | KU953246 | KU952619 | KU952745 |
| 12.0.073                                   | -              | <i>Avena sativa</i>          | Mato Grosso do Sul | 2012             | KU952117                      | KU952243 | KU952997 | KU952871 | KU952369 | KU952494 | KU953122 | KU953247 | KU952620 | KU952746 |
| 12.0.194 <sup>a</sup>                      | -              | <i>Elionorus candidus</i>    | Mato Grosso do Sul | 2012             | KU952118                      | KU952244 | KU952998 | KU952872 | KU952370 | KU952495 | KU953123 | KU953248 | KU952621 | KU952747 |
| 12.0.321                                   | -              | <i>Avena sativa</i>          | Mato Grosso do Sul | 2012             | KU952119                      | KU952245 | KU952999 | KU952873 | KU952371 | KU952496 | KU953124 | KU953249 | KU952622 | KU952748 |
| 12.0.326 <sup>a,b</sup>                    | -              | <i>Echinochloa crusgalli</i> | Mato Grosso do Sul | 2012             | KU952120                      | KU952246 | KU953000 | KU952874 | KU952372 | KU952497 | KU953125 | KU953250 | KU952623 | KU952749 |
| 12.0.345 <sup>a,b</sup>                    | -              | <i>Avena sativa</i>          | Mato Grosso do Sul | 2012             | KU952121                      | KU952247 | KU953001 | KU952875 | KU952373 | KU952498 | KU953126 | KU953251 | KU952624 | KU952750 |
| 12.0.346                                   | -              | <i>Avena sativa</i>          | Mato Grosso do Sul | 2012             | KU952122                      | KU952248 | KU953002 | KU952876 | KU952374 | KU952499 | KU953127 | KU953252 | KU952625 | KU952751 |
| 12.0.347                                   | -              | <i>Avena sativa</i>          | Mato Grosso do Sul | 2012             | KU952123                      | KU952249 | KU953003 | KU952877 | KU952375 | KU952500 | KU953128 | KU953253 | KU952626 | KU952752 |
| 12.0.366 <sup>a,b</sup>                    | -              | <i>Urochloa</i> spp.         | Mato Grosso do Sul | 2012             | KU952124                      | KU952250 | KU953004 | KU952878 | KU952376 | KU952501 | KU953129 | KU953254 | KU952627 | KU952753 |
| 12.0.368 <sup>a,b</sup>                    | -              | <i>Urochloa</i> spp.         | Mato Grosso do Sul | 2012             | KU952125                      | KU952251 | KU953005 | KU952879 | KU952377 | KU952502 | KU953130 | KU953255 | KU952628 | KU952754 |
| 12.0.534i <sup>a,b</sup>                   | -              | <i>Eleusine indica</i>       | Paraná             | 2012             | KU952126                      | KU952252 | KU953006 | KU952880 | KU952378 | KU952503 | KU953131 | KU953256 | KU952629 | KU952755 |
| 12.0.535i                                  | -              | <i>Cenchrus echinatus</i>    | Paraná             | 2012             | KU952127                      | KU952253 | KU953007 | KU952881 | KU952379 | KU952504 | KU953132 | KU953257 | KU952630 | KU952756 |
| 12.0.543i <sup>a</sup>                     | -              | <i>Elionorus candidus</i>    | Paraná             | 2012             | KU952128                      | KU952254 | KU953008 | KU952882 | KU952380 | KU952505 | KU953133 | KU953258 | KU952631 | KU952757 |
| 12.0.555i <sup>a</sup>                     | -              | <i>Digitaria sanguinalis</i> | Paraná             | 2012             | KU952129                      | KU952255 | KU953009 | KU952883 | KU952381 | KU952506 | KU953134 | KU953259 | KU952632 | KU952758 |
| 12.0.578i                                  | -              | <i>Cynodon</i> spp.          | Paraná             | 2012             | KU952130                      | KU952256 | KU953010 | KU952884 | KU952382 | KU952507 | KU953135 | KU953260 | KU952633 | KU952759 |
| 12.0.607i <sup>a,b</sup>                   | -              | <i>Rhynchelytrum repens</i>  | Paraná             | 2012             | KU952131                      | KU952257 | KU953011 | KU952885 | KU952383 | KU952508 | KU953136 | KU953261 | KU952634 | KU952760 |
| 12.0.613i                                  | -              | <i>Rhynchelytrum repens</i>  | Paraná             | 2012             | KU952132                      | KU952258 | KU953012 | KU952886 | KU952384 | KU952509 | KU953137 | KU953262 | KU952635 | KU952761 |
| 12.0.625i                                  | -              | <i>Digitaria sanguinalis</i> | Paraná             | 2012             | KU952133                      | KU952259 | KU953013 | KU952887 | KU952385 | KU952510 | KU953138 | KU953263 | KU952636 | KU952762 |
| 12.0.642i <sup>a,b</sup>                   | -              | <i>Cenchrus echinatus</i>    | Paraná             | 2012             | KU952240                      | KU952366 | -        | KU952994 | -        | KU952617 | -        | -        | KU952743 | -        |
| 12.0.655i <sup>a</sup>                     | -              | <i>Digitaria sanguinalis</i> | Paraná             | 2012             | KU952134                      | KU952260 | KU953014 | KU952888 | KU952386 | KU952511 | KU953139 | KU953264 | KU952637 | KU952763 |
| 12.1.002                                   | -              | <i>Triticum aestivum</i>     | Minas Gerais       | 2012             | KU952135                      | KU952261 | KU953015 | KU952889 | KU952387 | KU952512 | KU953140 | KU953265 | KU952638 | KU952764 |
| 12.1.002i                                  | -              | <i>Triticum aestivum</i>     | Paraná             | 2012             | KU952136                      | KU952262 | KU953016 | KU952890 | KU952388 | KU952513 | KU953141 | KU953266 | KU952639 | KU952765 |
| 12.1.019i                                  | -              | <i>Triticum aestivum</i>     | Paraná             | 2012             | KU952137                      | KU952263 | KU953017 | KU952891 | KU952389 | KU952514 | KU953142 | KU953267 | KU952640 | KU952766 |
| 12.1.037 <sup>a</sup>                      | -              | <i>Triticum aestivum</i>     | Goiás              | 2012             | KU952138                      | KU952264 | KU953018 | KU952892 | KU952390 | KU952515 | KU953143 | KU953268 | KU952641 | KU952767 |
| 12.1.048i                                  | -              | <i>Triticum aestivum</i>     | São Paulo          | 2012             | KU952139                      | KU952265 | KU953019 | KU952893 | KU952391 | KU952516 | KU953144 | KU953269 | KU952642 | KU952768 |
| 12.1.049i                                  | -              | <i>Triticum aestivum</i>     | São Paulo          | 2012             | KU952140                      | KU952266 | KU953020 | KU952894 | KU952392 | KU952517 | KU953145 | KU953270 | KU952643 | KU952769 |
| 12.1.050i                                  | -              | <i>Triticum aestivum</i>     | São Paulo          | 2012             | KU952141                      | KU952267 | KU953021 | KU952895 | KU952393 | KU952518 | KU953146 | KU953271 | KU952644 | KU952770 |
| 12.1.051i                                  | -              | <i>Triticum aestivum</i>     | São Paulo          | 2012             | KU952142                      | KU952268 | KU953022 | KU952896 | KU952394 | KU952519 | KU953147 | KU953272 | KU952645 | KU952771 |
| 12.1.052i                                  | -              | <i>Triticum aestivum</i>     | São Paulo          | 2012             | KU952143                      | KU952269 | KU953023 | KU952897 | KU952395 | KU952520 | KU953148 | KU953273 | KU952646 | KU952772 |
| 12.1.053i <sup>a</sup>                     | -              | <i>Triticum aestivum</i>     | São Paulo          | 2012             | KU952144                      | KU952270 | KU953024 | KU952898 | KU952396 | KU952521 | KU953149 | KU953274 | KU952647 | KU952773 |
| 12.1.061                                   | -              | <i>Triticum aestivum</i>     | Goiás              | 2012             | KU952145                      | KU952271 | KU953025 | KU952899 | KU952397 | KU952522 | KU953150 | KU953275 | KU952648 | KU952774 |
| 12.1.075                                   | -              | <i>Triticum aestivum</i>     | Goiás              | 2012             | KU952146                      | KU952272 | KU953026 | KU952900 | KU952398 | KU952523 | KU953151 | KU953276 | KU952649 | KU952775 |
| 12.1.109                                   | -              | <i>Triticum aestivum</i>     | Federal District   | 2012             | KU952147                      | KU952273 | KU953027 | KU952901 | KU952399 | KU952524 | KU953152 | KU953277 | KU952650 | KU952776 |
| 12.1.112                                   | -              | <i>Triticum aestivum</i>     | Federal District   | 2012             | KU952148                      | KU952274 | KU953028 | KU952902 | KU952400 | KU952525 | KU953153 | KU953278 | KU952651 | KU952777 |
| 12.1.117 <sup>a</sup>                      | -              | <i>Triticum aestivum</i>     | Federal District   | 2012             | KU952149                      | KU952275 | KU953029 | KU952903 | KU952401 | KU952526 | KU953154 | KU953279 | KU952652 | KU952778 |
| 12.1.149                                   | -              | <i>Triticum aestivum</i>     | Federal District   | 2012             | KU952150                      | KU952276 | KU953030 | KU952904 | KU952402 | KU952527 | KU953155 | KU953280 | KU952653 | KU952779 |
| 12.1.153                                   | -              | <i>Triticum aestivum</i>     | Federal District   | 2012             | KU952151                      | KU952277 | KU953031 | KU952905 | KU952403 | KU952528 | KU953156 | KU953281 | KU952654 | KU952780 |
| 12.1.191                                   | -              | <i>Triticum aestivum</i>     | Rio Grande do Sul  | 2012             | KU952152                      | KU952278 | KU953032 | KU952906 | KU952404 | KU952529 | KU953157 | KU953282 | KU952655 | KU952781 |
| <i>P. oryzae</i> pathotype <i>Triticum</i> |                |                              |                    |                  |                               |          |          |          |          |          |          |          |          |          |
| 12.0.007i <sup>a</sup>                     | -              | <i>Urochloa</i> spp.         | Paraná             | 2012             | KU952238                      | KU952364 | -        | KU952992 | -        | KU952615 | -        | -        | KU952741 | -        |
| 12.0.009i <sup>a,b</sup>                   | -              | <i>Urochloa</i> spp.         | Paraná             | 2012             | KU952176                      | KU952302 | KU953056 | KU952930 | KU952428 | KU952553 | KU953181 | KU953306 | KU952679 | KU952805 |
| 12.0.012i <sup>a,b</sup>                   | -              | <i>Urochloa</i> spp.         | Paraná             | 2012             | KU952239                      | KU952365 | -        | KU952993 | -        | KU952616 | -        | -        | KU952742 | -        |
| 12.1.001                                   | -              | <i>Triticum aestivum</i>     | Minas Gerais       | 2012             | KU952177                      | KU952303 | KU953057 | KU952931 | KU952429 | KU952554 | KU953182 | KU953307 | KU952680 | KU952806 |
| 12.1.005i                                  | -              | <i>Triticum aestivum</i>     | Paraná             | 2012             | KU952178                      | KU952304 | KU953058 | KU952932 | KU952430 | KU952555 | KU953183 | KU953308 | KU952681 | KU952807 |

| Species,<br>isolate     | Race | Host                     | Origin             | Sampling<br>year | NCBI GenBank Accession number |          |          |          |          |          |          |          |          |          |
|-------------------------|------|--------------------------|--------------------|------------------|-------------------------------|----------|----------|----------|----------|----------|----------|----------|----------|----------|
|                         |      |                          |                    |                  | ACT                           | BAC6     | βT-1     | CAL      | CH7-BAC7 | CH7-BAC9 | CHS      | EF-1α    | MPG1     | NUT1     |
| 12.1.007                | -    | <i>Triticum aestivum</i> | Minas Gerais       | 2012             | KU952179                      | KU952305 | KU953059 | KU952933 | KU952431 | KU952556 | KU953184 | KU953309 | KU952682 | KU952808 |
| 12.1.009                | -    | <i>Triticum aestivum</i> | Minas Gerais       | 2012             | KU952180                      | KU952306 | KU953060 | KU952934 | KU952432 | KU952557 | KU953185 | KU953310 | KU952683 | KU952809 |
| 12.1.010i               | -    | <i>Triticum aestivum</i> | Paraná             | 2012             | KU952181                      | KU952307 | KU953061 | KU952935 | KU952433 | KU952558 | KU953186 | KU953311 | KU952684 | KU952810 |
| 12.1.014                | -    | <i>Triticum aestivum</i> | Minas Gerais       | 2012             | KU952182                      | KU952308 | KU953062 | KU952936 | KU952434 | KU952559 | KU953187 | KU953312 | KU952685 | KU952811 |
| 12.1.014i               | -    | <i>Triticum aestivum</i> | Paraná             | 2012             | KU952183                      | KU952309 | KU953063 | KU952937 | KU952435 | KU952560 | KU953188 | KU953313 | KU952686 | KU952812 |
| 12.1.015                | -    | <i>Triticum aestivum</i> | Minas Gerais       | 2012             | KU952184                      | KU952310 | KU953064 | KU952938 | KU952436 | KU952561 | KU953189 | KU953314 | KU952687 | KU952813 |
| 12.1.020i               | -    | <i>Triticum aestivum</i> | Paraná             | 2012             | KU952185                      | KU952311 | KU953065 | KU952939 | KU952437 | KU952562 | KU953190 | KU953315 | KU952688 | KU952814 |
| 12.1.021i               | -    | <i>Triticum aestivum</i> | Paraná             | 2012             | KU952186                      | KU952312 | KU953066 | KU952940 | KU952438 | KU952563 | KU953191 | KU953316 | KU952689 | KU952815 |
| 12.1.032i <sup>b</sup>  | -    | <i>Triticum aestivum</i> | São Paulo          | 2012             | KU952187                      | KU952313 | KU953067 | KU952941 | KU952439 | KU952564 | KU953192 | KU953317 | KU952690 | KU952816 |
| 12.1.034i               | -    | <i>Triticum aestivum</i> | São Paulo          | 2012             | KU952188                      | KU952314 | KU953068 | KU952942 | KU952440 | KU952565 | KU953193 | KU953318 | KU952691 | KU952817 |
| 12.1.035                | -    | <i>Triticum aestivum</i> | Minas Gerais       | 2012             | KU952189                      | KU952315 | KU953069 | KU952943 | KU952441 | KU952566 | KU953194 | KU953319 | KU952692 | KU952818 |
| 12.1.045i               | -    | <i>Triticum aestivum</i> | São Paulo          | 2012             | KU952190                      | KU952316 | KU953070 | KU952944 | KU952442 | KU952567 | KU953195 | KU953320 | KU952693 | KU952819 |
| 12.1.058                | -    | <i>Triticum aestivum</i> | Goiás              | 2012             | KU952191                      | KU952317 | KU953071 | KU952945 | KU952443 | KU952568 | KU953196 | KU953321 | KU952694 | KU952820 |
| 12.1.078                | -    | <i>Triticum aestivum</i> | Goiás              | 2012             | KU952192                      | KU952318 | KU953072 | KU952946 | KU952444 | KU952569 | KU953197 | KU953322 | KU952695 | KU952821 |
| 12.1.085                | -    | <i>Triticum aestivum</i> | Rio Grande do Sul  | 2012             | KU952193                      | KU952319 | KU953073 | KU952947 | KU952445 | KU952570 | KU953198 | KU953323 | KU952696 | KU952822 |
| 12.1.087                | -    | <i>Triticum aestivum</i> | Minas Gerais       | 2012             | KU952194                      | KU952320 | KU953074 | KU952948 | KU952446 | KU952571 | KU953199 | KU953324 | KU952697 | KU952823 |
| 12.1.089                | -    | <i>Triticum aestivum</i> | Minas Gerais       | 2012             | KU952195                      | KU952321 | KU953075 | KU952949 | KU952447 | KU952572 | KU953200 | KU953325 | KU952698 | KU952824 |
| 12.1.097                | -    | <i>Triticum aestivum</i> | Minas Gerais       | 2012             | KU952196                      | KU952322 | KU953076 | KU952950 | KU952448 | KU952573 | KU953201 | KU953326 | KU952699 | KU952825 |
| 12.1.100                | -    | <i>Triticum aestivum</i> | Minas Gerais       | 2012             | KU952197                      | KU952323 | KU953077 | KU952951 | KU952449 | KU952574 | KU953202 | KU953327 | KU952700 | KU952826 |
| 12.1.107                | -    | <i>Triticum aestivum</i> | Goiás              | 2012             | KU952198                      | KU952324 | KU953078 | KU952952 | KU952450 | KU952575 | KU953203 | KU953328 | KU952701 | KU952827 |
| 12.1.116                | -    | <i>Triticum aestivum</i> | Federal District   | 2012             | KU952199                      | KU952325 | KU953079 | KU952953 | KU952451 | KU952576 | KU953204 | KU953329 | KU952702 | KU952828 |
| 12.1.119 <sup>b</sup>   | -    | <i>Triticum aestivum</i> | Federal District   | 2012             | KU952200                      | KU952326 | KU953080 | KU952954 | KU952452 | KU952577 | KU953205 | KU953330 | KU952703 | KU952829 |
| 12.1.127 <sup>a</sup>   | -    | <i>Triticum aestivum</i> | Mato Grosso do Sul | 2012             | KU952201                      | KU952327 | KU953081 | KU952955 | KU952453 | KU952578 | KU953206 | KU953331 | KU952704 | KU952830 |
| 12.1.132 <sup>a</sup>   | -    | <i>Triticum aestivum</i> | Mato Grosso do Sul | 2012             | KU952202                      | KU952328 | KU953082 | KU952956 | KU952454 | KU952579 | KU953207 | KU953332 | KU952705 | KU952831 |
| 12.1.135                | -    | <i>Triticum aestivum</i> | Minas Gerais       | 2012             | KU952203                      | KU952329 | KU953083 | KU952957 | KU952455 | KU952580 | KU953208 | KU953333 | KU952706 | KU952832 |
| 12.1.139                | -    | <i>Triticum aestivum</i> | Minas Gerais       | 2012             | KU952204                      | KU952330 | KU953084 | KU952958 | KU952456 | KU952581 | KU953209 | KU953334 | KU952707 | KU952833 |
| 12.1.146                | -    | <i>Triticum aestivum</i> | Mato Grosso do Sul | 2012             | KU952205                      | KU952331 | KU953085 | KU952959 | KU952457 | KU952582 | KU953210 | KU953335 | KU952708 | KU952834 |
| 12.1.147                | -    | <i>Triticum aestivum</i> | Mato Grosso do Sul | 2012             | KU952206                      | KU952332 | KU953086 | KU952960 | KU952458 | KU952583 | KU953211 | KU953336 | KU952709 | KU952835 |
| 12.1.148                | -    | <i>Triticum aestivum</i> | Mato Grosso do Sul | 2012             | KU952207                      | KU952333 | KU953087 | KU952961 | KU952459 | KU952584 | KU953212 | KU953337 | KU952710 | KU952836 |
| 12.1.158 <sup>a,b</sup> | -    | <i>Triticum aestivum</i> | Mato Grosso do Sul | 2012             | KU952208                      | KU952334 | KU953088 | KU952962 | KU952460 | KU952585 | KU953213 | KU953338 | KU952711 | KU952837 |
| 12.1.169 <sup>a,b</sup> | -    | <i>Triticum aestivum</i> | Mato Grosso do Sul | 2012             | KU952209                      | KU952335 | KU953089 | KU952963 | KU952461 | KU952586 | KU953214 | KU953339 | KU952712 | KU952838 |
| 12.1.174                | -    | <i>Triticum aestivum</i> | Mato Grosso do Sul | 2012             | KU952210                      | KU952336 | KU953090 | KU952964 | KU952462 | KU952587 | KU953215 | KU953340 | KU952713 | KU952839 |
| 12.1.179 <sup>a</sup>   | -    | <i>Triticum aestivum</i> | Rio Grande do Sul  | 2012             | KU952211                      | KU952337 | KU953091 | KU952965 | KU952463 | KU952588 | KU953216 | KU953341 | KU952714 | KU952840 |
| 12.1.180                | -    | <i>Triticum aestivum</i> | Rio Grande do Sul  | 2012             | KU952212                      | KU952338 | KU953092 | KU952966 | KU952464 | KU952589 | KU953217 | KU953342 | KU952715 | KU952841 |
| 12.1.181                | -    | <i>Triticum aestivum</i> | Rio Grande do Sul  | 2012             | KU952213                      | KU952339 | KU953093 | KU952967 | KU952465 | KU952590 | KU953218 | KU953343 | KU952716 | KU952842 |
| 12.1.182                | -    | <i>Triticum aestivum</i> | Rio Grande do Sul  | 2012             | KU952214                      | KU952340 | KU953094 | KU952968 | KU952466 | KU952591 | KU953219 | KU953344 | KU952717 | KU952843 |
| 12.1.183                | -    | <i>Triticum aestivum</i> | Mato Grosso do Sul | 2012             | KU952215                      | KU952341 | KU953095 | KU952969 | KU952467 | KU952592 | KU953220 | KU953345 | KU952718 | KU952844 |
| 12.1.186                | -    | <i>Triticum aestivum</i> | Rio Grande do Sul  | 2012             | KU952216                      | KU952342 | KU953096 | KU952970 | KU952468 | KU952593 | KU953221 | KU953346 | KU952719 | KU952845 |
| 12.1.187                | -    | <i>Triticum aestivum</i> | Rio Grande do Sul  | 2012             | KU952217                      | KU952343 | KU953097 | KU952971 | KU952469 | KU952594 | KU953222 | KU953347 | KU952720 | KU952846 |
| 12.1.193                | -    | <i>Triticum aestivum</i> | Rio Grande do Sul  | 2012             | KU952218                      | KU952344 | KU953098 | KU952972 | KU952470 | KU952595 | KU953223 | KU953348 | KU952721 | KU952847 |
| 12.1.194                | -    | <i>Triticum aestivum</i> | Rio Grande do Sul  | 2012             | KU952219                      | KU952345 | KU953099 | KU952973 | KU952471 | KU952596 | KU953224 | KU953349 | KU952722 | KU952848 |
| 12.1.197                | -    | <i>Triticum aestivum</i> | Rio Grande do Sul  | 2012             | KU952220                      | KU952346 | KU953100 | KU952974 | KU952472 | KU952597 | KU953225 | KU953350 | KU952723 | KU952849 |
| 12.1.204 <sup>a</sup>   | -    | <i>Triticum aestivum</i> | Rio Grande do Sul  | 2012             | KU952221                      | KU952347 | KU953101 | KU952975 | KU952473 | KU952598 | KU953226 | KU953351 | KU952724 | KU952850 |
| 12.1.205 <sup>a</sup>   | -    | <i>Triticum aestivum</i> | Rio Grande do Sul  | 2012             | KU952222                      | KU952348 | KU953102 | KU952976 | KU952474 | KU952599 | KU953227 | KU953352 | KU952725 | KU952851 |
| 12.1.207                | -    | <i>Triticum aestivum</i> | Rio Grande do Sul  | 2012             | KU952223                      | KU952349 | KU953103 | KU952977 | KU952475 | KU952600 | KU953228 | KU953353 | KU952726 | KU952852 |
| 12.1.209                | -    | <i>Triticum aestivum</i> | Rio Grande do Sul  | 2012             | KU952224                      | KU952350 | KU953104 | KU952978 | KU952476 | KU952601 | KU953229 | KU953354 | KU952727 | KU952853 |
| 12.1.213                | -    | <i>Triticum aestivum</i> | Mato Grosso do Sul | 2012             | KU952225                      | KU952351 | KU953105 | KU952979 | KU952477 | KU952602 | KU953230 | KU953355 | KU952728 | KU952854 |

| Species,<br>isolate                | Race  | Host                         | Origin             | Sampling<br>year | NCBI GenBank Accession number |          |             |          |          |          |          |               |          |          |
|------------------------------------|-------|------------------------------|--------------------|------------------|-------------------------------|----------|-------------|----------|----------|----------|----------|---------------|----------|----------|
|                                    |       |                              |                    |                  | ACT                           | BAC6     | $\beta$ T-1 | CAL      | CH7-BAC7 | CH7-BAC9 | CHS      | EF-1 $\alpha$ | MPG1     | NUT1     |
| 12.1.217                           | -     | <i>Triticum aestivum</i>     | Rio Grande do Sul  | 2012             | KU952226                      | KU952352 | KU953106    | KU952980 | KU952478 | KU952603 | KU953231 | KU953356      | KU952729 | KU952855 |
| 12.1.219                           | -     | <i>Triticum aestivum</i>     | Rio Grande do Sul  | 2012             | KU952227                      | KU952353 | KU953107    | KU952981 | KU952479 | KU952604 | KU953232 | KU953357      | KU952730 | KU952856 |
| 12.1.225                           | -     | <i>Triticum aestivum</i>     | Rio Grande do Sul  | 2012             | KU952228                      | KU952354 | KU953108    | KU952982 | KU952480 | KU952605 | KU953233 | KU953358      | KU952731 | KU952857 |
| 12.1.228                           | -     | <i>Triticum aestivum</i>     | Rio Grande do Sul  | 2012             | KU952229                      | KU952355 | KU953109    | KU952983 | KU952481 | KU952606 | KU953234 | KU953359      | KU952732 | KU952858 |
| 12.1.234                           | -     | <i>Triticum aestivum</i>     | Mato Grosso do Sul | 2012             | KU952230                      | KU952356 | KU953110    | KU952984 | KU952482 | KU952607 | KU953235 | KU953360      | KU952733 | KU952859 |
| 12.1.236                           | -     | <i>Triticum aestivum</i>     | Mato Grosso do Sul | 2012             | KU952231                      | KU952357 | KU953111    | KU952985 | KU952483 | KU952608 | KU953236 | KU953361      | KU952734 | KU952860 |
| 12.1.241                           | -     | <i>Triticum aestivum</i>     | Mato Grosso do Sul | 2012             | KU952232                      | KU952358 | KU953112    | KU952986 | KU952484 | KU952609 | KU953237 | KU953362      | KU952735 | KU952861 |
| 12.1.243 <sup>a</sup>              | -     | <i>Triticum aestivum</i>     | Mato Grosso do Sul | 2012             | KU952233                      | KU952359 | KU953113    | KU952987 | KU952485 | KU952610 | KU953238 | KU953363      | KU952736 | KU952862 |
| 12.1.288                           | -     | <i>Triticum aestivum</i>     | Paraná             | 2012             | KU952234                      | KU952360 | KU953114    | KU952988 | KU952486 | KU952611 | KU953239 | KU953364      | KU952737 | KU952863 |
| 12.1.291 <sup>a,b</sup>            | -     | <i>Triticum aestivum</i>     | Paraná             | 2012             | KU952235                      | KU952361 | KU953115    | KU952989 | KU952487 | KU952612 | KU953240 | KU953365      | KU952738 | KU952864 |
| 12.1.311                           | -     | <i>Triticum aestivum</i>     | Paraná             | 2012             | KU952236                      | KU952362 | KU953116    | KU952990 | KU952488 | KU952613 | KU953241 | KU953366      | KU952739 | KU952865 |
| 12.1.315                           | -     | <i>Triticum aestivum</i>     | Paraná             | 2012             | KU952237                      | KU952363 | KU953117    | KU952991 | KU952489 | KU952614 | KU953242 | KU953367      | KU952740 | KU952866 |
| <i>P. oryzae</i> pathotype Oryza   |       |                              |                    |                  |                               |          |             |          |          |          |          |               |          |          |
| 97                                 | ID-1  | <i>Oryza sativa</i>          | Tocantins          | 2007             | KU952175                      | KU952301 | KU953055    | KU952929 | KU952427 | KU952552 | KU953180 | KU953305      | KU952678 | KU952804 |
| 284                                | IB-34 | <i>Oryza sativa</i>          | Tocantins          | 2007             | KU952158                      | KU952284 | KU953038    | KU952912 | KU952410 | KU952535 | KU953163 | KU953288      | KU952661 | KU952787 |
| 323                                | IC-1  | <i>Oryza sativa</i>          | Tocantins          | 2006             | KU952159                      | KU952285 | KU953039    | KU952913 | KU952411 | KU952536 | KU953164 | KU953289      | KU952662 | KU952788 |
| 364                                | IC-17 | <i>Oryza sativa</i>          | Tocantins          | 2007             | KU952160                      | KU952286 | KU953040    | KU952914 | KU952412 | KU952537 | KU953165 | KU953290      | KU952663 | KU952789 |
| 421                                | ID-2  | <i>Oryza sativa</i>          | Tocantins          | 2007             | KU952161                      | KU952287 | KU953041    | KU952915 | KU952413 | KU952538 | KU953166 | KU953291      | KU952664 | KU952790 |
| 611                                | IA-65 | <i>Oryza sativa</i>          | Tocantins          | 2007             | KU952162                      | KU952288 | KU953042    | KU952916 | KU952414 | KU952539 | KU953167 | KU953292      | KU952665 | KU952791 |
| 641                                | IB-41 | <i>Oryza sativa</i>          | Goiás              | 2007             | KU952163                      | KU952289 | KU953043    | KU952917 | KU952415 | KU952540 | KU953168 | KU953293      | KU952666 | KU952792 |
| 658                                | IB-9  | <i>Oryza sativa</i>          | Goiás              | 2006             | KU952164                      | KU952290 | KU953044    | KU952918 | KU952416 | KU952541 | KU953169 | KU953294      | KU952667 | KU952793 |
| 674                                | IB-33 | <i>Oryza sativa</i>          | Goiás              | 2007             | KU952165                      | KU952291 | KU953045    | KU952919 | KU952417 | KU952542 | KU953170 | KU953295      | KU952668 | KU952794 |
| 678 <sup>a,b</sup>                 | IA-33 | <i>Oryza sativa</i>          | Goiás              | 2006             | KU952166                      | KU952292 | KU953046    | KU952920 | KU952418 | KU952543 | KU953171 | KU953296      | KU952669 | KU952795 |
| 695                                | IA-41 | <i>Oryza sativa</i>          | Tocantins          | 2007             | KU952167                      | KU952293 | KU953047    | KU952921 | KU952419 | KU952544 | KU953172 | KU953297      | KU952670 | KU952796 |
| 704 <sup>a</sup>                   | IA-1  | <i>Oryza sativa</i>          | Tocantins          | 2007             | KU952168                      | KU952294 | KU953048    | KU952922 | KU952420 | KU952545 | KU953173 | KU953298      | KU952671 | KU952797 |
| 706                                | IA-25 | <i>Oryza sativa</i>          | Tocantins          | 2007             | KU952169                      | KU952295 | KU953049    | KU952923 | KU952421 | KU952546 | KU953174 | KU953299      | KU952672 | KU952798 |
| 8762 <sup>a,b</sup>                | -     | <i>Oryza sativa</i>          | Central Brazil     | 2013             | KU952170                      | KU952296 | KU953050    | KU952924 | KU952422 | KU952547 | KU953175 | KU953300      | KU952673 | KU952799 |
| 8763                               | -     | <i>Oryza sativa</i>          | Central Brazil     | 2013             | KU952171                      | KU952297 | KU953051    | KU952925 | KU952423 | KU952548 | KU953176 | KU953301      | KU952674 | KU952800 |
| 8772                               | -     | <i>Oryza sativa</i>          | Central Brazil     | 2013             | KU952172                      | KU952298 | KU953052    | KU952926 | KU952424 | KU952549 | KU953177 | KU953302      | KU952675 | KU952801 |
| 8844                               | -     | <i>Oryza sativa</i>          | Central Brazil     | 2013             | KU952173                      | KU952299 | KU953053    | KU952927 | KU952425 | KU952550 | KU953178 | KU953303      | KU952676 | KU952802 |
| 8847                               | -     | <i>Oryza sativa</i>          | Central Brazil     | 2013             | KU952174                      | KU952300 | KU953054    | KU952928 | KU952426 | KU952551 | KU953179 | KU953304      | KU952677 | KU952803 |
| 10659 <sup>b</sup>                 | -     | <i>Oryza sativa</i>          | Central Brazil     | 2013             | KU952153                      | KU952279 | KU953033    | KU952907 | KU952405 | KU952530 | KU953158 | KU953283      | KU952656 | KU952782 |
| 10783                              | -     | <i>Oryza sativa</i>          | Central Brazil     | 2013             | KU952154                      | KU952280 | KU953034    | KU952908 | KU952406 | KU952531 | KU953159 | KU953284      | KU952657 | KU952783 |
| 10877                              | -     | <i>Oryza sativa</i>          | Central Brazil     | 2013             | KU952155                      | KU952281 | KU953035    | KU952909 | KU952407 | KU952532 | KU953160 | KU953285      | KU952658 | KU952784 |
| 10879                              | -     | <i>Oryza sativa</i>          | Central Brazil     | 2013             | KU952156                      | KU952282 | KU953036    | KU952910 | KU952408 | KU952533 | KU953161 | KU953286      | KU952659 | KU952785 |
| 10880 <sup>a,b</sup>               | -     | <i>Oryza sativa</i>          | Central Brazil     | 2013             | KU952157                      | KU952283 | KU953037    | KU952911 | KU952409 | KU952534 | KU953162 | KU953287      | KU952660 | KU952786 |
| Reference sequences                |       |                              |                    |                  |                               |          |             |          |          |          |          |               |          |          |
| <i>P. pennisetigena</i> , 12.0.100 |       | <i>Cenchrus echinatus</i>    | Mato Grosso do Sul | 2012             | KU963214                      | KU963216 | KU953118    | KU963218 | KU952490 | KU963220 | KU953243 | KU953368      | KU963222 | KU952867 |
| <i>P. grisea</i> , 12.0.082        |       | <i>Digitaria sanguinalis</i> | Mato Grosso do Sul | 2012             | KU963215                      | KU963217 | KU953119    | KU963219 | KU952491 | KU963221 | KU953244 | KU953369      | KU963223 | KU952868 |

<sup>a</sup>. Isolates included in the cultural and morphological characterization assays

<sup>b</sup>. Isolates included in the pathogenicity spectra assays

<sup>c</sup>. '-' indicates no data available.

**Table 2** Primers used in this study

| Locus           | Forward primer (5' - 3') | Reverse primer (5' - 3')  | AT (°C) <sup>a</sup> | Expected PCR product (bp) | Reference             |
|-----------------|--------------------------|---------------------------|----------------------|---------------------------|-----------------------|
| <i>ACT</i>      | CGTCTTCCGTAAGTGCCC       | GCCCATACCAATCATGATAC      | 58                   | 279                       | This study            |
| <i>BAC6</i>     | ACATCATTGTCCTCCTCGTC     | G TTCCTGTCATT CATT TTTCAA | 54                   | 283                       | Couch, et al. 2005.   |
| <i>βT-1</i>     | CCAGCTCAACTCTGATCTCC     | GGTACTCGGAAACAAGATCG      | 56 - 58 <sup>b</sup> | 604                       | This study            |
| <i>CAL</i>      | CTTACCGAAGAGCAAGTTTCCG   | TYTTCCTGGCCATCATGGTS      | 55                   | 648                       | This study            |
| <i>CHS</i>      | TGGGGCAAGGATGCTTGGAAGAAG | TGGAAGAACCATCTGTGAGAGTTG  | 55                   | 300                       | Carbone & Kohn, 1999. |
| <i>CH7-BAC7</i> | AAGACACGAGAGCAAAGAAAGAAG | CGATACATTACAGTGCCTACGAA   | 55                   | 313                       | Couch, et al. 2005.   |
| <i>CH7-BAC9</i> | TGTAAGAAGCTCGGTGACTGAT   | AGTGTTGCTTGAACGGCTAA      | 59                   | 296                       | Couch, et al. 2005.   |
| <i>EF-1α</i>    | CTYGGTGT TAGGCAGCTCA     | GAAMTTGCAGGCRATGTGGG      | 55                   | 722                       | This study            |
| <i>MPG1</i>     | AGATCCCCATCGACGTTCTC     | TCCCTCACAGAACTCCAAAC      | 55                   | 368                       | Couch, et al. 2005.   |
| <i>NUT1</i>     | AAGTATGGCGCTTCTTCAGC     | GCGCATTGGTCTTTAGTGGT      | 55                   | 268                       | Couch, et al. 2005.   |

<sup>a</sup>. AT, Annealing temperature.

<sup>b</sup>. AT of 56°C was used with DNA from isolates obtained from wheat and rice, and annealing temperature of 58°C was used with DNA of isolates obtained from other Poaceous hosts.



**Table 3** Number of fixed sequence differences in ten loci among *Pyricularia* species and clusters

| Species, clade                                                                                        | Locus                              | ACT | BAC6 | $\beta$ T-1 | CAL | CHS | CH7-BAC7 | CH7-BAC9 | EF-1 $\alpha$ | MPG1 | NUT1 | Total | %    |
|-------------------------------------------------------------------------------------------------------|------------------------------------|-----|------|-------------|-----|-----|----------|----------|---------------|------|------|-------|------|
|                                                                                                       | Alignment length (bp)              | 184 | 257  | 504         | 524 | 285 | 293      | 229      | 658           | 229  | 224  | 3387  |      |
|                                                                                                       | Ungapped sequence mean length (bp) | 179 | 251  | 503         | 519 | 285 | 268      | 224      | 643           | 205  | 224  | 3301  |      |
| <i>Pyricularia graminis-tritici</i> (Group 1 vs. Group 2) <sup>a</sup>                                |                                    | 0   | 0    | 0           | 0   | 0   | 8        | 0        | 0             | 0    | 0    | 8     | 0.24 |
| <i>P. graminis-tritici</i> vs. <i>P. oryzae</i> pathotype <i>Triticum</i> (C.1) <sup>b</sup>          |                                    | 0   | 0    | 0           | 0   | 0   | 0        | 0        | 0             | 17   | 0    | 17    | 0.50 |
| <i>P. graminis-tritici</i> vs. <i>P. oryzae</i> pathotype <i>Triticum</i> (C.2) <sup>b</sup>          |                                    | 0   | 0    | 0           | 0   | 0   | 0        | 0        | 0             | 16   | 0    | 16    | 0.47 |
| <i>P. graminis-tritici</i> vs. <i>P. oryzae</i> pathotype <i>Oryza</i>                                |                                    | 0   | 0    | 1           | 0   | 0   | 1        | 0        | 1             | 15   | 0    | 18    | 0.53 |
| <i>P. oryzae</i> pathotype <i>Triticum</i> (C.1) vs. <i>P. oryzae</i> pathotype <i>Triticum</i> (C.2) |                                    | 0   | 0    | 0           | 0   | 0   | 0        | 0        | 0             | 5    | 0    | 5     | 0.15 |
| <i>P. oryzae</i> pathotype <i>Triticum</i> (C.1) vs. <i>P. oryzae</i> pathotype <i>Oryza</i>          |                                    | 0   | 0    | 0           | 0   | 0   | 1        | 0        | 1             | 4    | 0    | 6     | 0.18 |
| <i>P. oryzae</i> pathotype <i>Triticum</i> (C.2) vs. <i>P. oryzae</i> pathotype <i>Oryza</i>          |                                    | 0   | 0    | 1           | 0   | 0   | 1        | 0        | 1             | 1    | 0    | 4     | 0.12 |
| Total                                                                                                 |                                    | 0   | 0    | 1           | 0   | 0   | 9        | 0        | 1             | 19   | 0    | 30    | 0.89 |

<sup>a</sup> The separation between the two groups of *Pyricularia graminis-tritici* was not supported by Bayesian posterior probability ( $P = 0.64$ ). Therefore, for further comparisons with the other *Pyricularia* species, these two groups were collapsed.

<sup>b</sup> C.1= Clade 1; C.2 = Clade 2

**Table 4** Polymorphic sites in four loci among *Pyricularia* spp.

| Species, clade                                       | Locus             | $\beta T-1$ |      | CH7-BAC9 |      |      |      |      |      |      |      | $EF-1\alpha$ |      | MPG1 |      |      |      |      |      |      |      |      |      |      |      |      |      |      |      |      |      |
|------------------------------------------------------|-------------------|-------------|------|----------|------|------|------|------|------|------|------|--------------|------|------|------|------|------|------|------|------|------|------|------|------|------|------|------|------|------|------|------|
|                                                      | Aligment position | 776         | 1771 | 1812     | 1828 | 1933 | 1837 | 1890 | 1912 | 2008 | 2009 | 2597         | 2934 | 2937 | 2940 | 2943 | 2944 | 2950 | 2952 | 2953 | 2954 | 2955 | 2957 | 2964 | 2965 | 2968 | 2973 | 2974 | 2978 | 2979 | 3019 |
|                                                      | Locus position    | 338         | 20   | 61       | 77   | 82   | 86   | 140  | 161  | 258  | 259  | 325          | 4    | 7    | 10   | 13   | 14   | 20   | 22   | 23   | 24   | 25   | 27   | 33   | 34   | 36   | 41   | 42   | 46   | 47   | 87   |
| <i>Pyricularia graminis-tritici</i>                  |                   | A           | C    | A/G      | A/G  | C/A  | A/C  | T/C  | T/C  | C/A  | A/G  | T            | T    | T    | C    | T    | C    | A    | C    | C    | A    | G    | C    | C    | A    | A    | A    | G    | T    | C    | C    |
| <i>P. oryzae</i> pathotype <i>Triticum</i> (Clade 1) |                   | A/C         | C    | G        | G    | A    | C    | C    | C    | A    | G    | T            | T    | C    | T    | C    | G    | C    | T    | T    | C    | -    | T    | T    | C    | T    | -    | -    | T    | T    | A    |
| <i>P. oryzae</i> pathotype <i>Triticum</i> (Clade 2) |                   | A           | C    | G        | G    | A    | C    | C    | C    | A    | G    | T            | C    | T    | T    | C    | G    | C    | T    | T    | C    | -    | T    | T    | C    | A    | -    | -    | C    | C    | A    |
| <i>P. oryzae</i> pathotype <i>Oryza</i>              |                   | C           | A    | G        | G    | A    | C    | C    | C    | A    | G    | C            | C    | T    | T    | C    | G    | C    | T    | T    | C    | -    | T    | T    | C    | A    | -    | -    | T    | C    | A    |
| <i>P. pennisetigena</i>                              |                   | A           | C    | G        | G    | A    | C    | C    | C    | A    | G    | C            | T    | A    | A    | A    | T    | T    | A    | T    | C    | A    | T    | T    | C    | T    | -    | G    | C    | C    | A    |
| <i>P. grisea</i>                                     |                   | C           | C    | G        | G    | A    | C    | C    | C    | A    | G    | C            | A    | T    | T    | T    | T    | C    | A    | T    | G    | G    | C    | C    | G    | A    | A    | -    | T    | T    | A    |

**Table 5** Pathogenicity of isolates of *Pyricularia* spp. on seedling of five poaceous hosts

| Species, cluster                                     | Host     | Mean scores for disease index <sup>a</sup> |            |              |         |            |          |          |               |
|------------------------------------------------------|----------|--------------------------------------------|------------|--------------|---------|------------|----------|----------|---------------|
|                                                      |          | Wheat                                      | Barley     | Signal grass |         | Oat        |          | Rice     |               |
|                                                      | Cultivar | Anahuac 75                                 | BRS Korbel | Marandú      | Piatá   | EMBRAPA 29 | IAPAR 61 | IRGA 409 | Sha Tsao Tsao |
| <i>Pyricularia graminis-tritici</i> sp. nov.         |          | 4.09 b                                     | 3.82 a     | 1.75 b       | 0.38 a  | 3.43 a     | 3.46 a   | 0.00 b   | 0.12 c        |
| <i>P. oryzae</i> pathotype <i>Triticum</i> (Clade 1) |          | 4.62 a                                     | 3.88 a     | 1.76 b       | 0.52 a  | 2.77 a     | 2.94 a   | 0.02 b   | 0.28 b        |
| <i>P. oryzae</i> pathotype <i>Triticum</i> (Clade 2) |          | 4.15 ab                                    | 3.95 a     | 2.90 a       | 0.35 ab | 2.58 a     | 3.21 a   | 0.00 b   | 0.75 a        |
| <i>P. oryzae</i> pathotype <i>Oryza</i>              |          | 2.00 c                                     | 3.91 a     | 0.18 c       | 0.21 b  | 1.28 b     | 0.85 b   | 1.80 a   | 0.64 a        |
| Species effect                                       |          |                                            |            |              |         |            |          |          |               |
| $\chi^2$                                             |          | 82.1229                                    | 0.6931     | 58.1669      | 3.6766  | 56.2658    | 81.7092  | 92.7205  | 13.7001       |
| $P > \chi^2$                                         |          | <0.0001                                    | 0.8748     | <0.0001      | 0.2886  | <0.0001    | <0.0001  | <0.0001  | 0.0030        |
| Experiment effect                                    |          |                                            |            |              |         |            |          |          |               |
| $\chi^2$                                             |          | 1.8216                                     | 3.9535     | 0.5244       | 2.9081  | 2.3851     | 0.3039   | 0.7286   | 2.3419        |
| $P > \chi^2$                                         |          | 0.1771                                     | 0.0500     | 0.4690       | 0.0881  | 0.1225     | 0.5493   | 0.3934   | 0.1259        |

<sup>a</sup>. Mean disease index was averaged over five repetitions per test, and two test replicates were conducted. Each repetition (pot) had five seedlings for rice, and eight seedlings for the other hosts. Disease index was assessed 7 d after inoculation using an ordinal scale for 0 to 5, and based on lesion type (Urashima et al. 2005). In this scale, 0 = no visible reaction; 1 = minute, pinhead-sized spots; 2 = small brown to dark brown lesions with no distinguishable centers; 3 = small eyespot shaped lesions; with grey centers; 4 = typical elliptical blast lesions with grey centers; 5 = complete dead plant. Disease index means with the same letter are not significantly different according to Dunn's all pairs for joint ranks non-parametric test ( $P > \chi^2 \leq 0.05$ ).

**Table 6** Pathogenicity of isolates of *Pyricularia* spp. on non-detached heads of wheat (*Triticum aestivum*) cv. Anahuac 75

| Species, clade                                       | Disease index (% head affected area) <sup>a</sup> |                |                   |                |
|------------------------------------------------------|---------------------------------------------------|----------------|-------------------|----------------|
|                                                      | Experiment 1                                      |                | Experiment 2      |                |
|                                                      | Least Mean Square                                 | Standard Error | Least Mean Square | Standard Error |
| <i>Pyricularia graminis-tritici</i> sp. nov.         | 56.25 a                                           | 1.66           | 47.92 a           | 2.31           |
| <i>P. oryzae</i> pathotype <i>Triticum</i> (Clade 1) | 45.22 b                                           | 2.07           | 47.51 a           | 2.63           |
| <i>P. oryzae</i> pathotype <i>Triticum</i> (Clade 2) | 26.15 c                                           | 2.91           | 34.01 b           | 4.69           |
| <i>P. oryzae</i> pathotype <i>Oryza</i>              | 2.13 d                                            | 2.12           | 8.35 c            | 2.87           |
| Species effect                                       |                                                   |                |                   |                |
| <i>P</i>                                             | <0.0001                                           |                | 0.037             |                |
| LSD                                                  | 6.2637                                            |                | 9.0194            |                |

a. Mean disease index was averaged over five repetitions per test, and two test replicates were conducted. Each repetition (pot) had five seedlings for rice, and eight seedlings for the other hosts. Disease index was assessed 7 d after inoculation using an ordinal scale for 0 to 5, and based on lesion type (Urashima et al. 2005). In this scale, 0 = no visible reaction; 1 = minute, pinhead-sized spots; 2 = small brown to dark brown lesions with no distinguishable centers; 3 = small eyespot shaped lesions; with grey centers; 4 = typical elliptical blast lesions with grey centers; 5 = complete dead plant. Disease index means with the same letter are not significantly different according to Dunn's all pairs for joint ranks non-parametric test ( $P > \chi^2 \leq 0.05$ ).

## FIGURE LEGENDS

**Fig.1** Phylogeny inferred by Bayesian- maximum likelihood from the combined sequences of 10 loci (actin, *BAC6*,  $\beta$ -tubulin, calmodulin, *CH7-BAC7*, *CH7-BAC9*, 6 chitin synthase 1, translation elongation factor 1- $\alpha$ , hydrophobin, and nitrogen regulatory protein 1) from isolates of *Pyricularia* spp. The 50% majority-rule consensus tree is shown. The numbers above the branches are the Bayesian posterior probabilities for node support. *Pyricularia grisea* and *P. pennisetigena* were used as out-groups. The original host of the isolate was distinguished by taxa colour, 11 black: wheat; orange: rice and green: other poaceous hosts.

**Fig. 2** *Pyricularia graminis-tritici* sp. nov. a–j: cultures of isolate 12.0.534i grown for 7 d at 12 h photoperiod and 25°C in CMA (a–f), MEA (b–g), OA (c–h), PDA (d–i), and SNA (e–j) media; k–l, sporulation on SNA on sterile barley seeds; m–o, scanning electron micrographs; p–x, bright field microscopy images; **scale bars**.

**Fig. 3** *Pyricularia oryzae* pathotype *Triticum*. a–j: cultures of isolate 12.1.291 grown for 7 d at 12 h photoperiod and 25°C in CMA (a–f), MEA (b–g), OA (c–h), PDA (d–i), and SNA (e–j) media; k–l, sporulation on SNA on sterile barley seeds; m–o, scanning electron micrographs; p–v, bright field microscopy images; **scale bars**.

**Fig. 4** *Pyricularia oryzae* pathotype *Oryza*; a–j: cultures of isolate 10880 grown for 7 d at 12 h photoperiod and 25°C in CMA (a–f), MEA (b–g), OA (c–h), PDA (d–i), and SNA (e–j) media; k–l, sporulation on SNA on sterile barley seeds; m–o, scanning electron micrographs; p–t, bright field microscopy images; **scale bars**.

**Fig. 5** Boxplot distribution of leaf blast severity of seedlings of five poaceous hosts as response to inoculations with isolates of *P. graminis-tritici* sp. nov. (Pgt, N= 7), *P. oryzae* pathotype *Triticum* Clade 1 (PoT C1, N = 5), *P. oryzae* pathotype *Triticum* Clade 2 (PoT C2, N = 2), and *P. oryzae* pathotype *Oryza* (PoO, N = 4). Boxplots represent blast severity as mean disease index assessed 7 d after inoculation using an ordinal scale for 0 to 5, and based on lesion type (Urashima et al. 2005). Disease index means with the same letter are not significantly different according to Dunn's all pairs for joint ranks non-parametric test ( $P > \chi^2 \leq 0.05$ ). a, inoculated seedling of wheat (*Triticum aestivum*); b, barley (*Hordeum vulgare*) cv. BRS Korbell; c, signal grass (*Urochloa brizantha*) cv. Marandú; c, signal grass cv. Piatá; e, oats (*Avena sativa*) cv. EMBRAPA 29; f, oats cv. IAPAR 61; g, rice (*Oryza sativa*) cv. IRGA 409.

**Fig. 6** Boxplot distribution of blast severity observed on heads of wheat (*Triticum 41 aestivum*) cv. Anahuac after inoculations with isolates of *P. graminis-tritici* sp. nov. (Pgt, N = 7), *P. oryzae* pathotype *Triticum* Clade 1 (PoT C1, N = 5), *P. oryzae* pathotype *Triticum* Clade 2 (PoTC2, N = 2), and *P. oryzae* pathotype *Oryza* (PoO, N = 4). Heads were not detached from the plant. Boxplots represent blast severity as mean disease index assessed 7 d after inoculation as percentage wheat head affected by blast using Assess v. 2.0 Image Analysis software. Head tissue was considered diseased when was chlorotic and/or covered in pathogen spores. The test was conducted twice, and replicates were analysed independently (a,b). Disease index means with the same letter are not significantly different according to Fisher's protected least significant different test at  $P \leq 0.05$ .

**Fig. 7** Blast symptoms on leaves and heads of poaceous host after inoculation with *Pyricularia* species. Inoculated hosts: a and f, wheat (*Triticum aestivum*); b, Barley (*Hordeum vulgare*); c, signal grass (*Urochloa brizantha*); d, oats (*Avena sativa*); e, rice (*Oryza sativa*). *Pyricularia* species: *Pyricularia graminis-tritici* sp. nov. (Pgt), *P. oryzae* pathotype *Triticum* Clade 1 (PoT C1) and Clade 2 (PoT C2), and *P. oryzae* pathotype *Oryza* (PoO). Control plants (C) were inoculated with sterile deionized water amended with Tween 80 (2 drops/L). Plants were assessed for disease symptoms 7 d after inoculation.

Fig. 1 Phylogenetic analysis

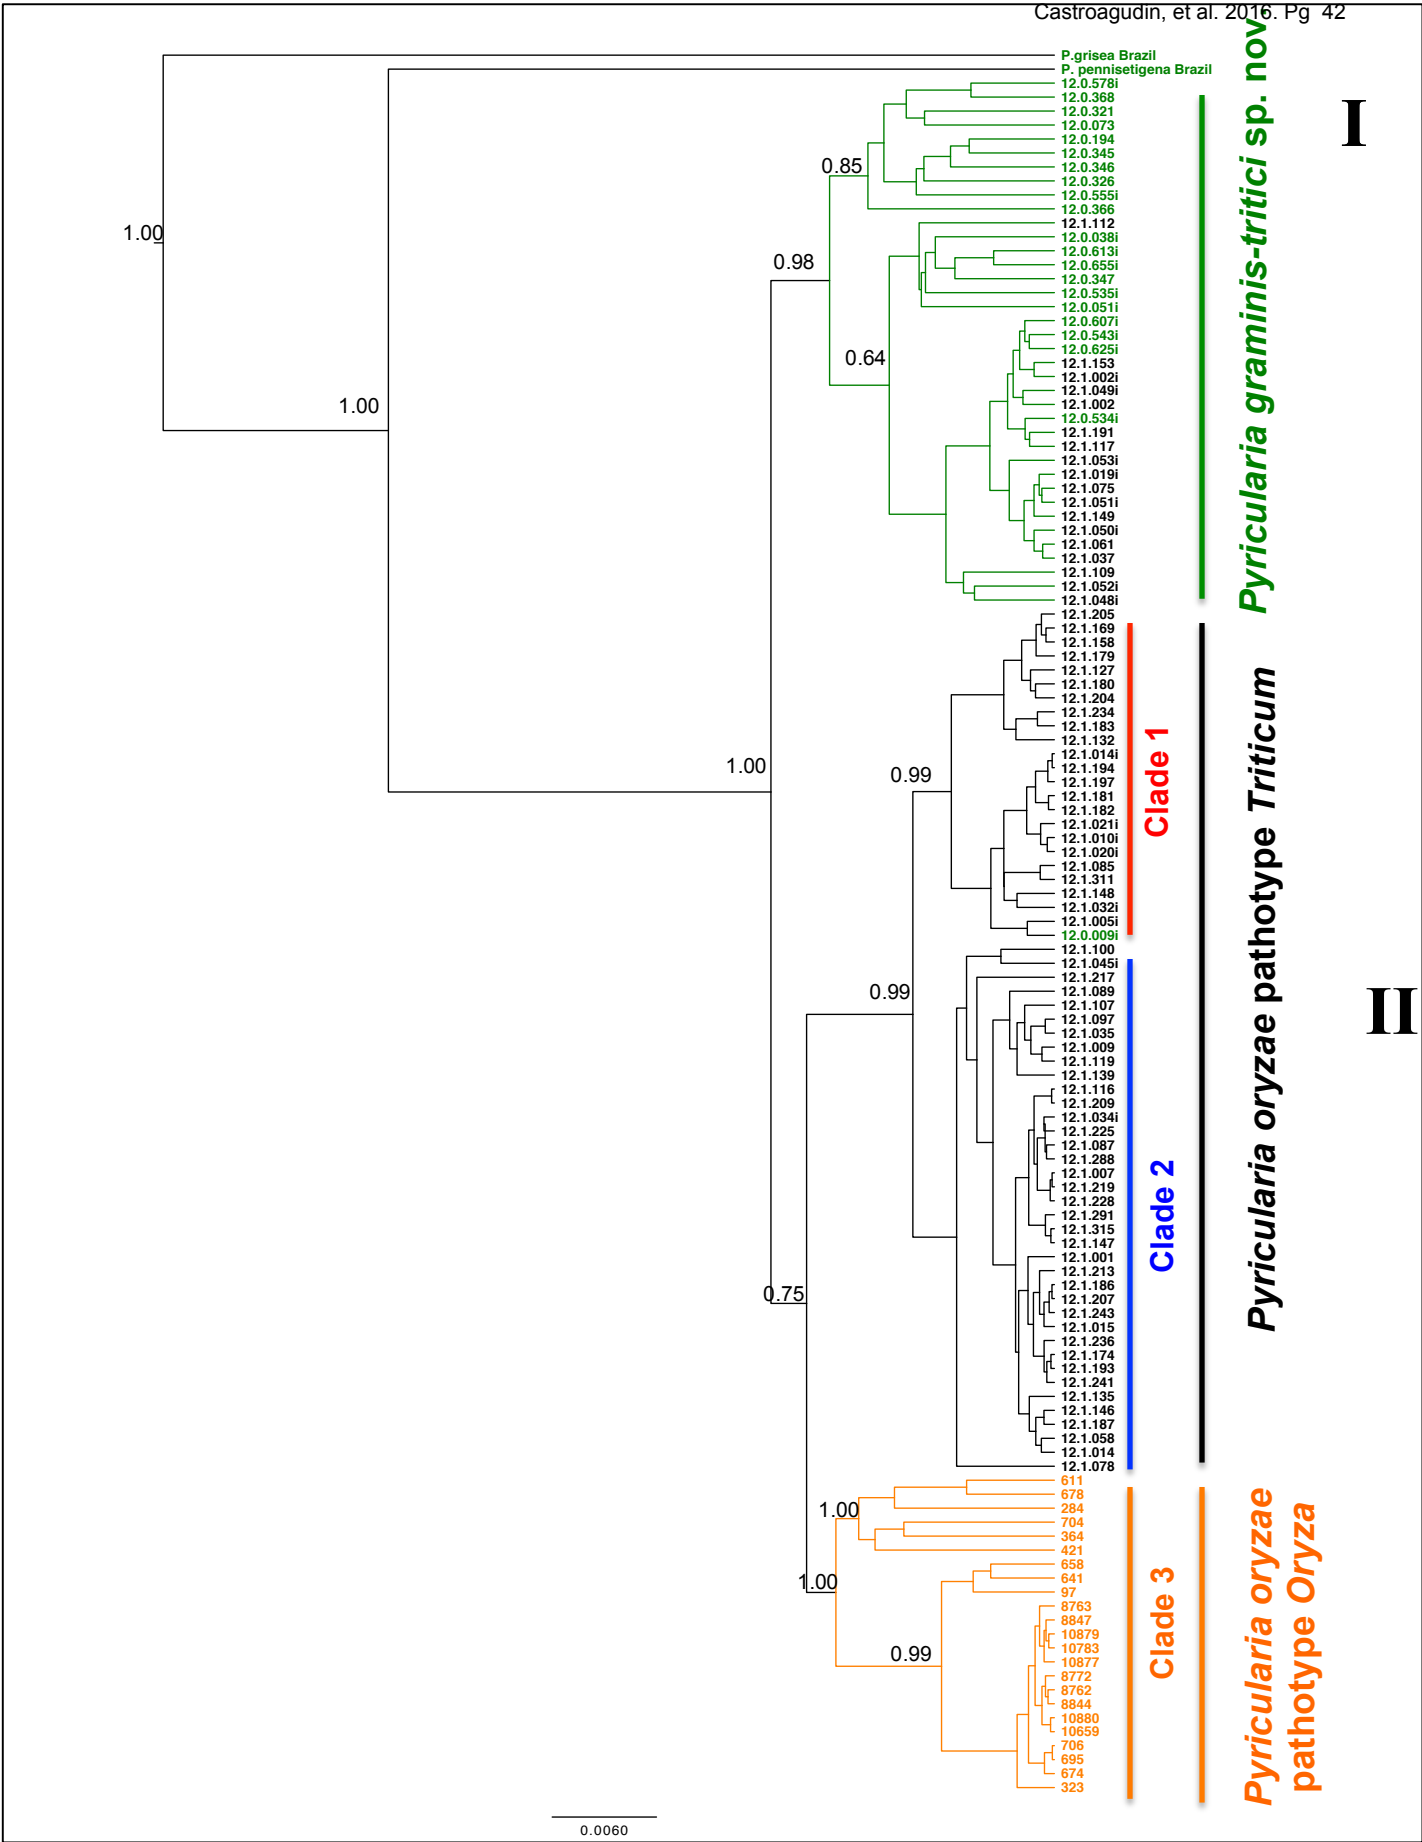



**Fig 2**

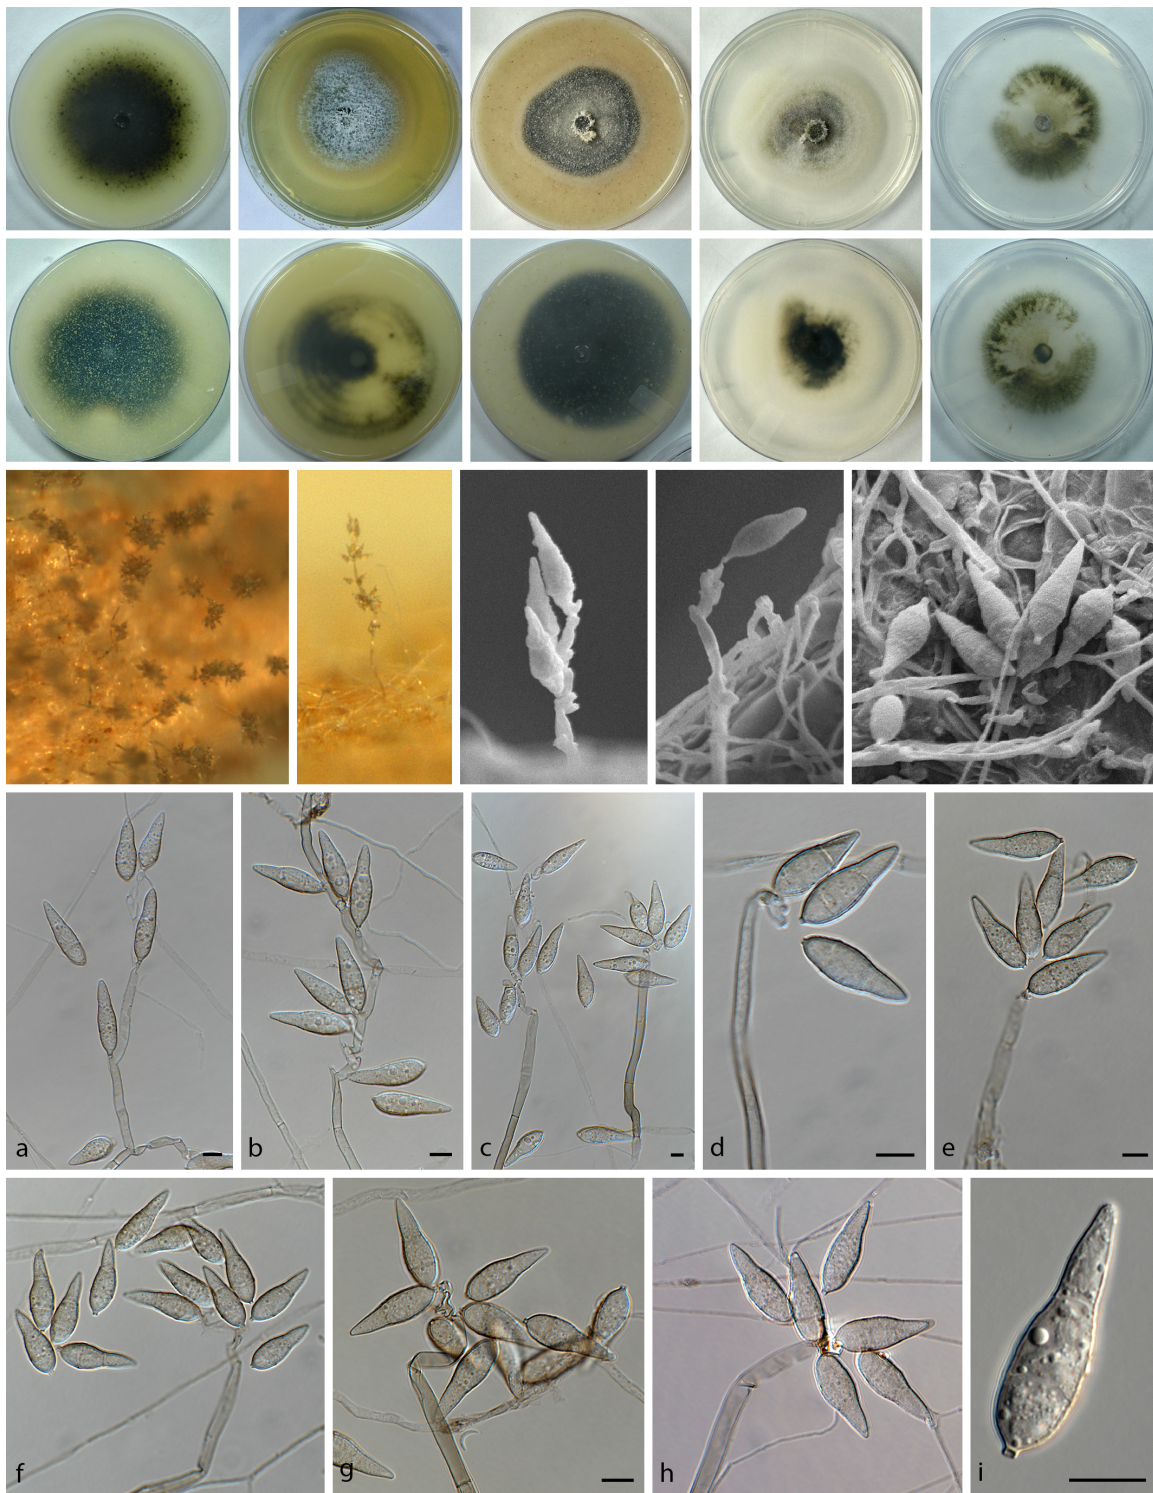



**Fig 3**

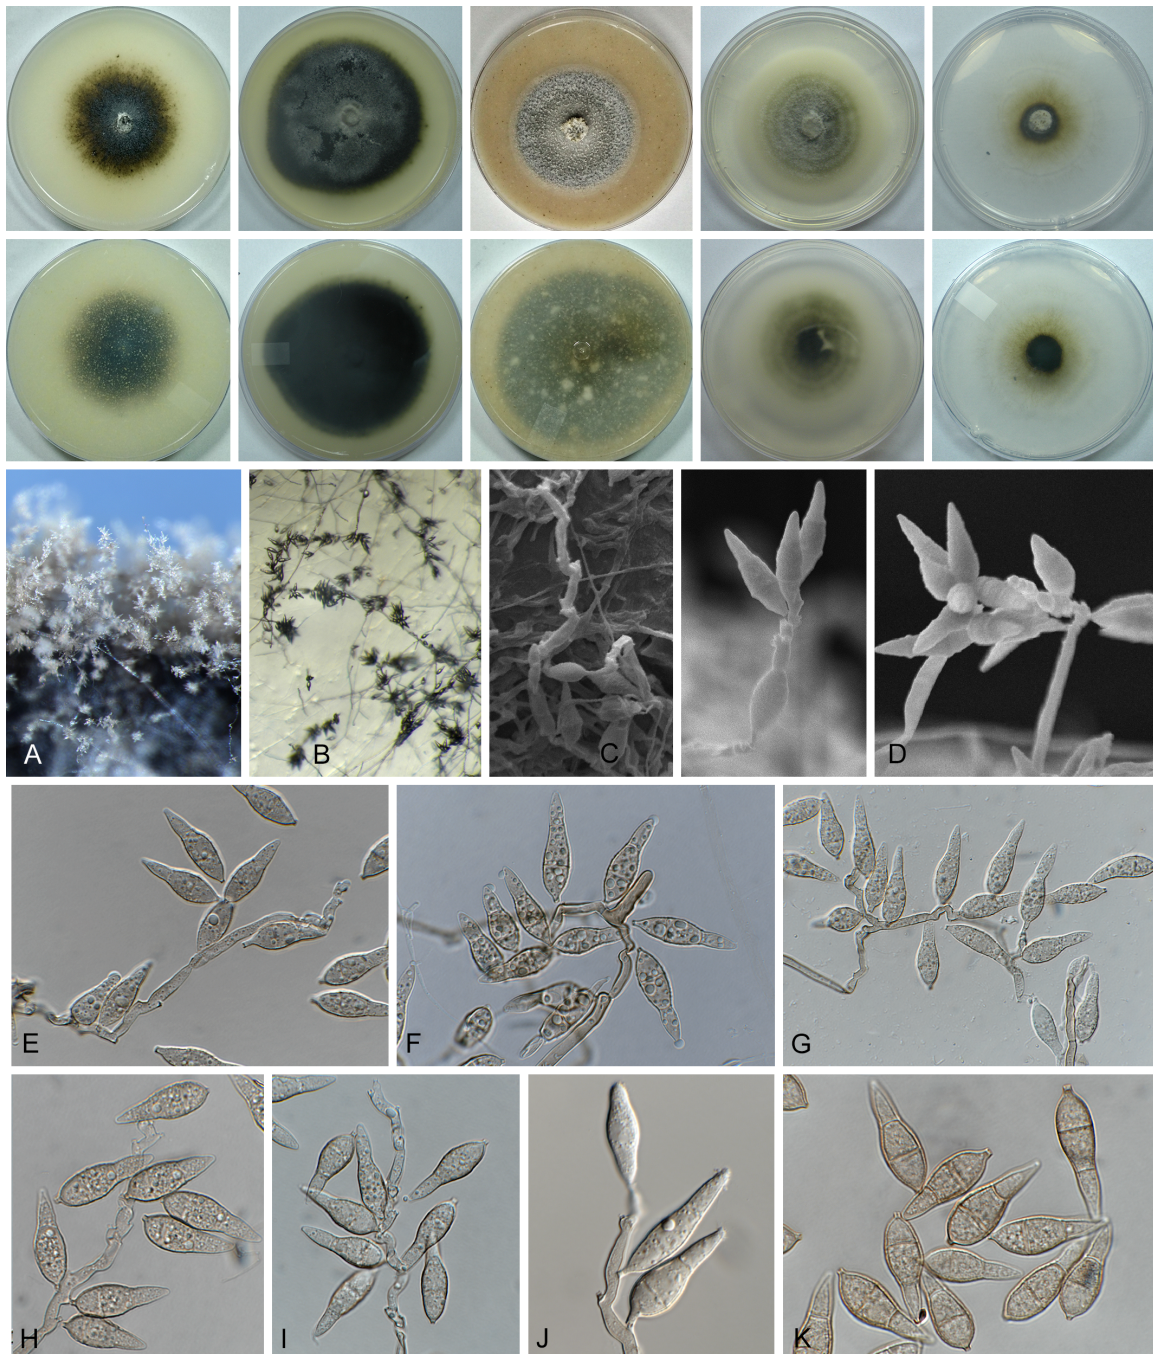



**Fig 4**

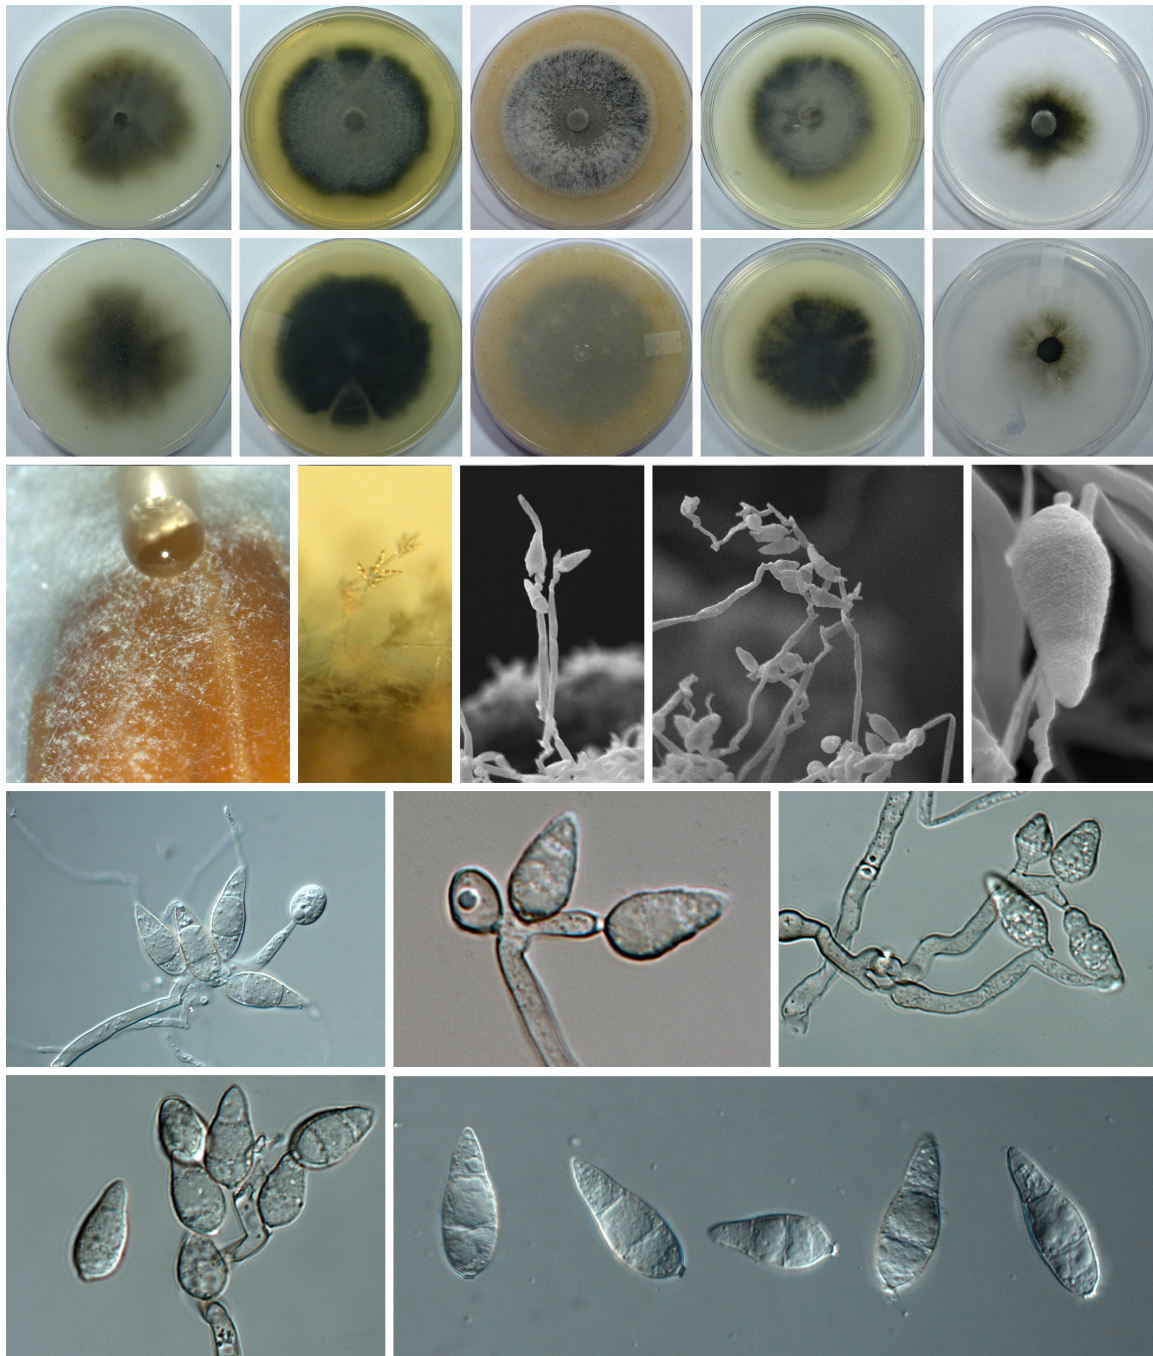

FIG. 5.

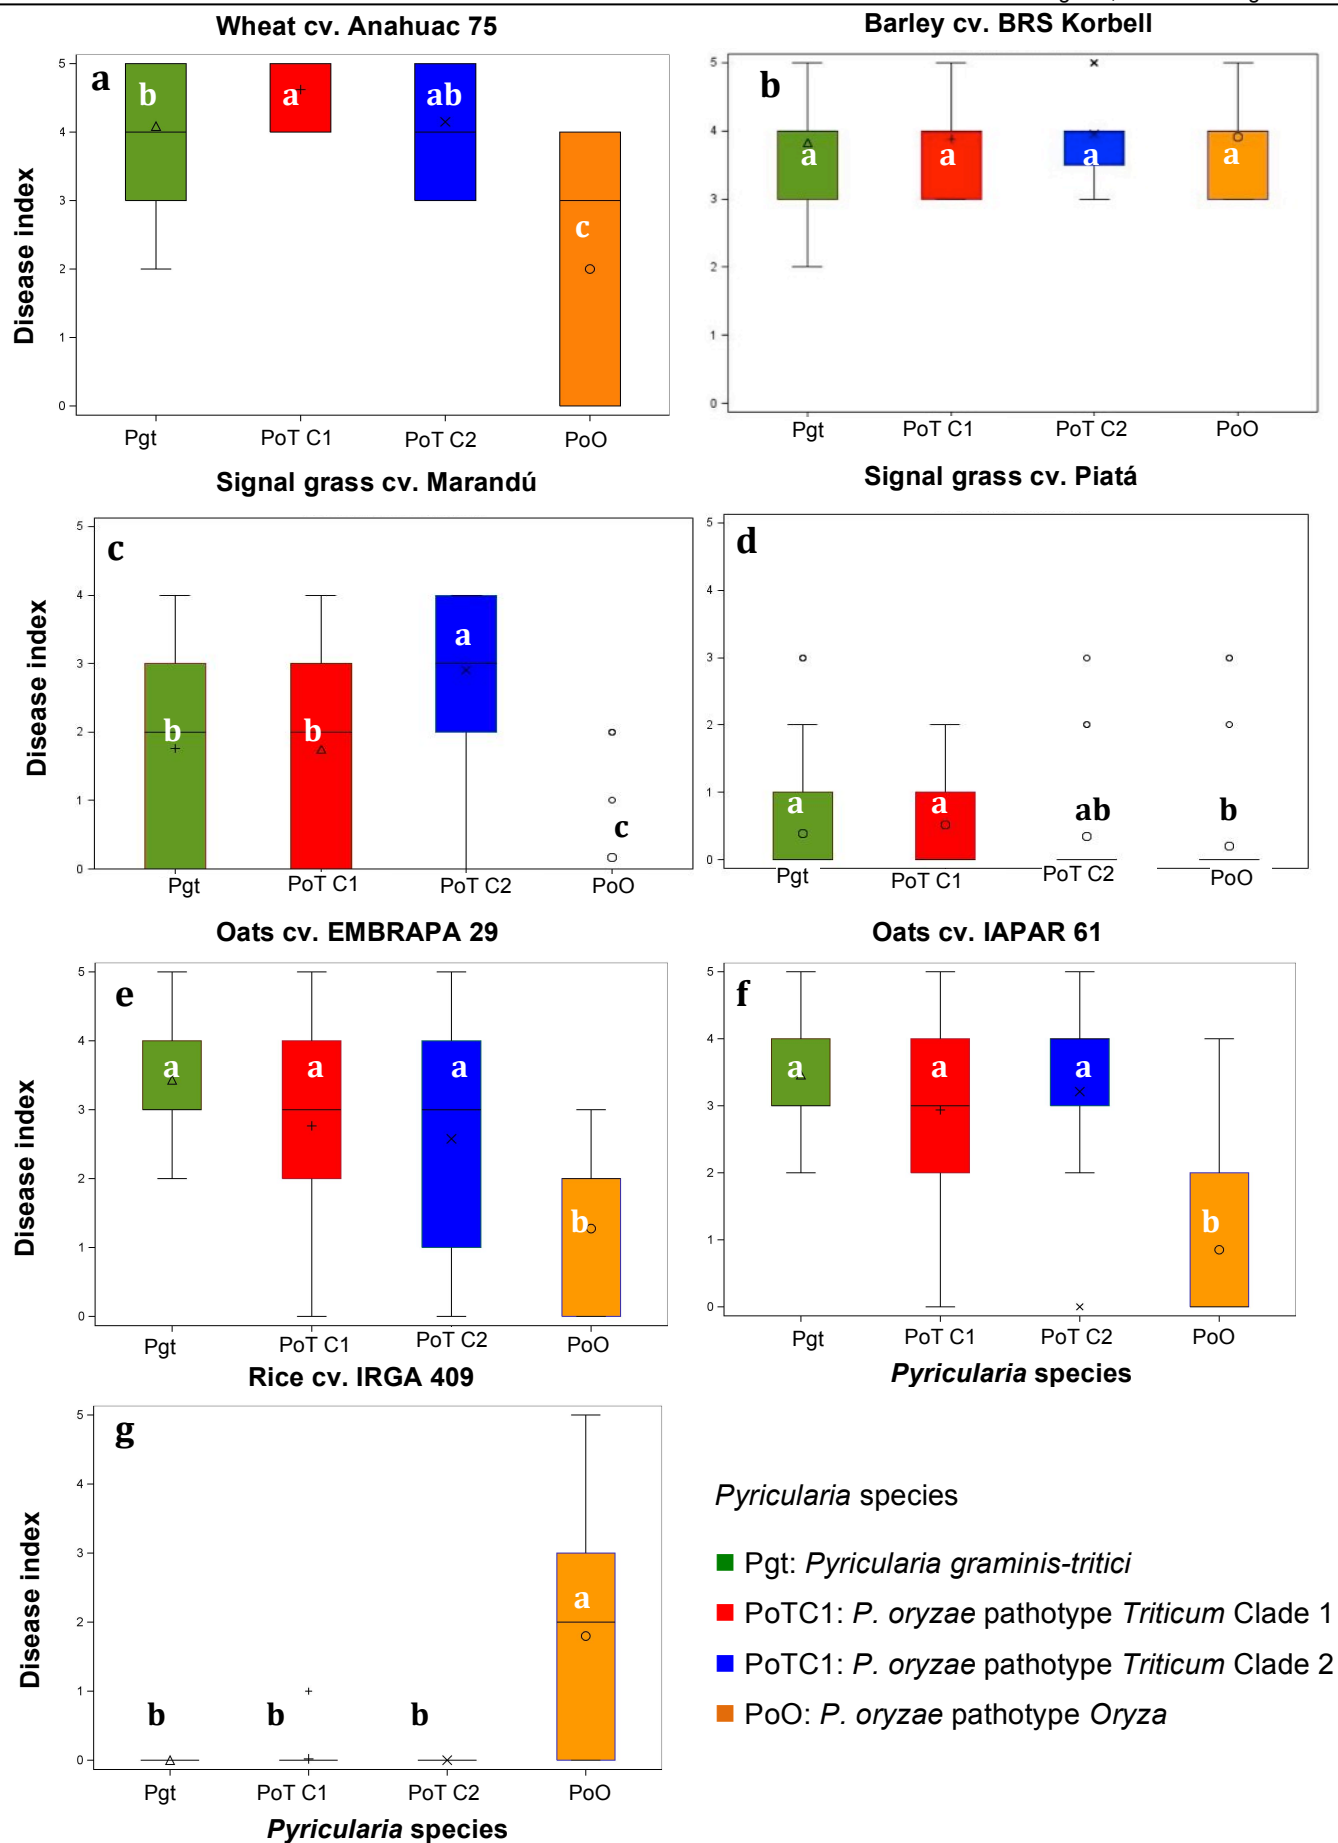

**Fig. 6.**

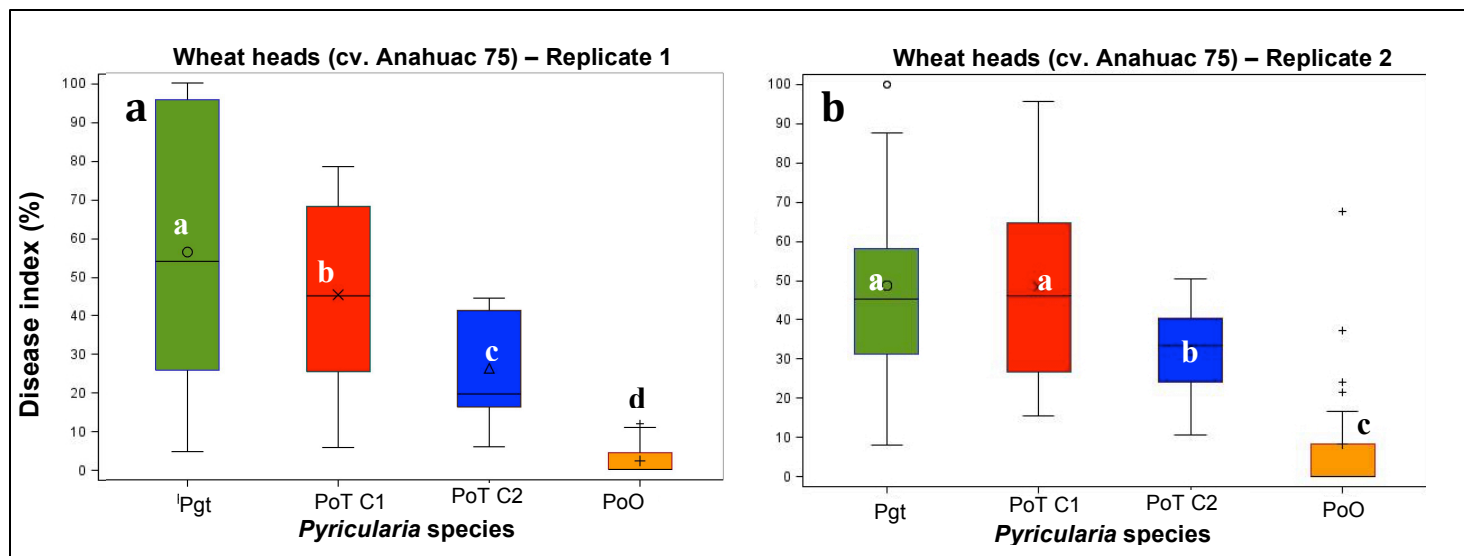

**Fig 7**

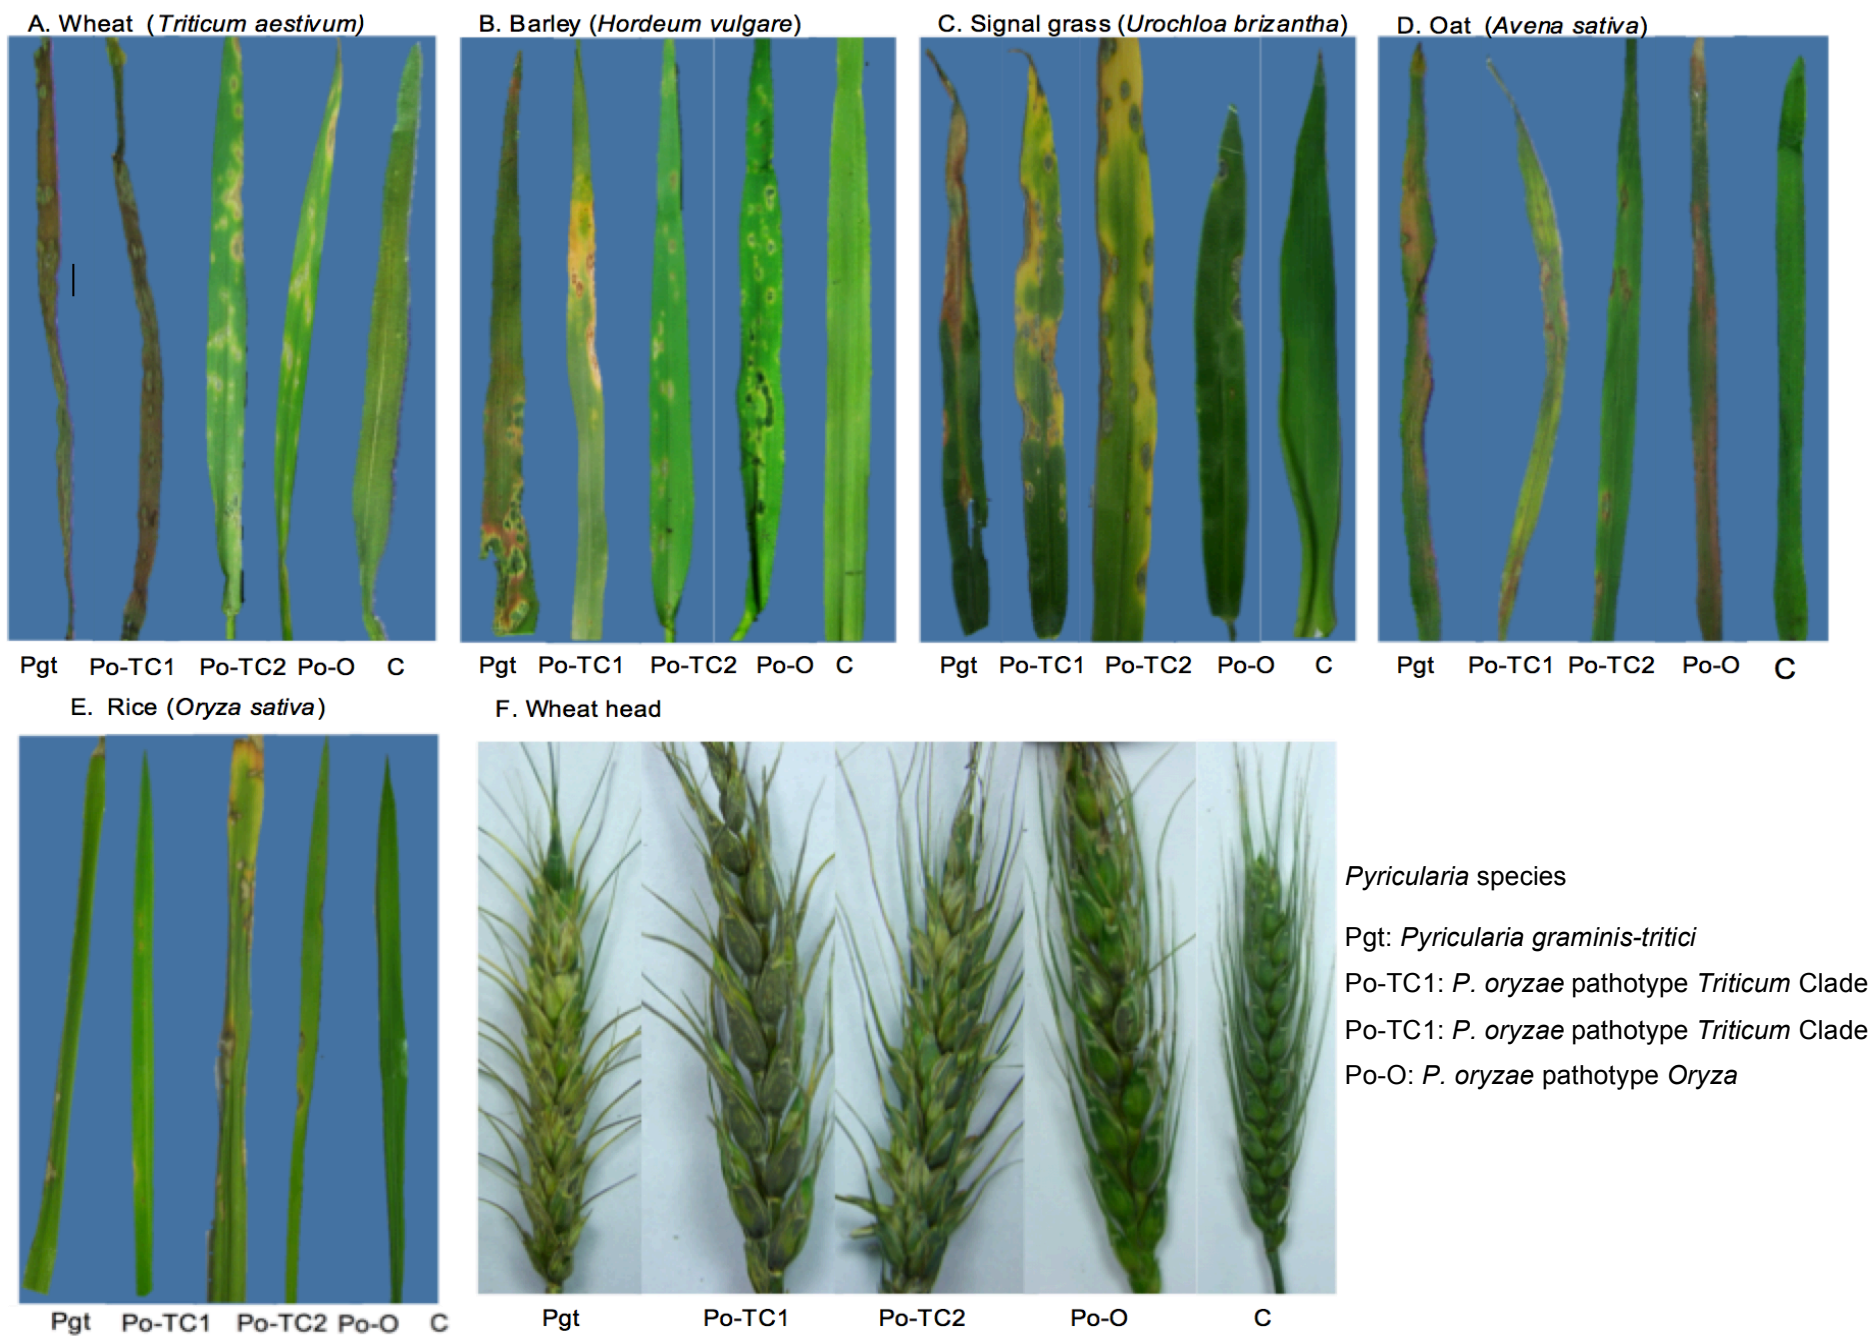

Source: http://biorxiv.org/content/10.1101/051151v1.full.pdf
